1 **Skeletal Muscle Proteostasis Promotes Central Nervous System Rejuvenation and**  
2 **Reduces Neuroinflammation during Aging and Neurodegenerative Disease**

3 Ian Matthews <sup>1</sup>

4 Allison Birnbaum <sup>1</sup>

5 Anastasia Gromova <sup>2,3</sup>

6 Kristen Coutinho <sup>1</sup>

7 Megan McGraw <sup>1</sup>

8 Dalton Patterson <sup>1</sup>

9 Macy T. Banks <sup>1</sup>

10 Amber Nobles <sup>1</sup>

11 Nhat Nguyen <sup>3</sup>

12 Helen C. Miranda <sup>9-11</sup>

13 Albert R. La Spada <sup>3,12</sup>

14 Constanza J. Cortes <sup>1,4-8</sup>(corresponding author)

15 <sup>1</sup> Department of Cell, Developmental and Integrative Biology, <sup>2</sup> Biomedical Sciences Graduate  
16 Program, University of California, San Diego <sup>3</sup> Department of Pathology and Laboratory  
17 Medicine, University of California, Irvine <sup>4</sup> UAB Center for Exercise Medicine, <sup>5</sup> UAB Nathan  
18 Shock Center, <sup>6</sup> UAB Alzheimer's Disease Center, <sup>7</sup> UAB Center for Neurodegeneration and  
19 Experimental Therapeutics, <sup>8</sup> University of Alabama at Birmingham, <sup>9</sup> Department of Genetics  
20 and Genome Sciences, School of Medicine, Case Western University, <sup>10</sup> Department of  
21 Neurosciences, School of Medicine, Case Western Reserve University, <sup>11</sup> RNA Center, School  
22 of Medicine, Case Western Reserve University, <sup>12</sup> Department of Neurology and Department of  
23 Biological Chemistry, UCI Institute for Neurotherapeutics, University of California, Irvine

24 **Funding:** NIH RF1 AG057264 (CJC and ALS), NIH R03 AG063215 (CJC), University of  
25 Washington Nathan Shock Center Pilot Grant (CJC), NIH R35 122140 (ALS).

26 **Acknowledgements:** we thank members of the lab past and present for their helpful  
27 contributions

28 **ABSTRACT**

29 Skeletal muscle has recently arisen as a novel regulator of Central Nervous System (CNS)  
30 function and aging, secreting bioactive molecules known as myokines with proteostasis and  
31 metabolism-modifying functions in targeted tissues, including the CNS. Here we report the  
32 generation of a novel transgenic mouse with enhanced skeletal muscle proteostasis via  
33 moderate overexpression of master regulator of proteostasis and lysosomal function  
34 Transcription Factor E-B. We have discovered that the resulting enhanced muscle proteostasis  
35 function significantly ameliorates proteotoxicity, reduces neuroinflammation and promotes  
36 transcriptional remodeling of the aging CNS, preserving cognition and memory in aging mice.  
37 Enhancing skeletal muscle proteostasis also reduces neuroinflammation and accumulation of  
38 tau-associated pathological hallmarks in a mouse model of tau pathology. Our results implicate  
39 maintenance of skeletal muscle proteostasis throughout aging to direct regulations of the aging  
40 CNS metabolism and function, and suggest that skeletal-muscle originating factors may act as  
41 novel therapeutic targets against age-associated neurodegenerative diseases.

42

## 43 INTRODUCTION

44 Aging is associated with an organism-wide progressive loss of tissue form and function, broadly  
45 characterized by the ‘hallmarks of aging’<sup>1</sup>. In particular, the aging central nervous system  
46 (CNS)<sup>1,2</sup> exhibits a global loss in protein homeostasis (proteostasis), impaired neuroplasticity  
47 and resilience, and an increase in neuroinflammation<sup>2,3</sup>. These alterations are believed to render  
48 the aging CNS vulnerable to age-associated dysfunction and the development of  
49 neurodegenerative disease<sup>2</sup>. A central player in proteostasis function is macroautophagy  
50 (hereafter referred to as autophagy), which degrades and recycles intracellular material such as  
51 dysfunctional mitochondria, protein aggregates, and other large subcellular components too  
52 large to be processed through the proteasome. Autophagy activity steadily declines with age<sup>4</sup>,  
53 leading to a chronic accumulation of damaged macromolecules and organelles in aging tissues<sup>4</sup>  
54 and contributing to the onset of age-associated diseases<sup>1,4</sup>. In concordance with this, genetic  
55 disruption of autophagy in specific cell types is sufficient to drive cellular and biochemical  
56 hallmarks of aging in young tissues, including accumulation of protein aggregates<sup>5,6</sup>,  
57 mitochondrial dysfunction<sup>7</sup> and compromised metabolic signaling<sup>7-9</sup>. Autophagy dysfunction has  
58 thus been proposed to act as a primary regulator of biological aging<sup>1,4</sup>. Consistent with this  
59 hypothesis, many well-known geroprotective interventions appear to work through the promotion  
60 of autophagy function<sup>4</sup>. Indeed, studies have shown that maintenance of global autophagy via  
61 genetic<sup>10-12</sup>, behavioral<sup>13</sup> and pharmacological<sup>14,15</sup> manipulation extends lifespan and/or  
62 healthspan in murine and primate models. Autophagy activation *in vivo* also delays the  
63 development of age-associated metabolic phenotypes<sup>7,13,16</sup> and preserves motor function  
64 during aging<sup>11</sup>. Taken together, these results position autophagy as an excellent target for  
65 therapeutic development to prevent age-associated CNS functional decline.

66 Elegant genetic studies on non-vertebrate models have recently revealed the existence of  
67 transcriptional protein quality control feedback between tissues, i.e. the cell-non autonomous  
68 control of organismal proteostasis<sup>17-21</sup>. In particular, manipulation of skeletal muscle protein  
69 quality control pathways yields important benefits to the CNS by activating proteostasis and  
70 protecting against the accumulation of aggregation-prone neurodegenerative disease proteins in  
71 the brain and the retina<sup>18,21,22</sup>. Although the mechanisms responsible for these benefits remain  
72 poorly understood, some of these effects are mediated by secreted factors that move through  
73 the invertebrate circulation<sup>18,20,22</sup>. Indeed, increasing evidence implicates circulating factors in  
74 the blood as potent regulators of mammalian CNS aging and metabolism<sup>23-26</sup>. For example,  
75 exposure to a young plasma environment (either through heterochronic parabiosis or plasma

76 transfers) can rescue function in the aging CNS<sup>25,27</sup> by decreasing neuroinflammation<sup>28</sup> and  
77 enhancing neurogenesis<sup>23</sup>. Studies have further demonstrated that increasing the circulating  
78 levels of these individual factors in peripheral circulation is sufficient to rejuvenate the aged  
79 CNS<sup>25,29,30</sup>, supporting the existence of geroprotective circulating factors with CNS targeting  
80 effects. Although the source and identity of these neuroprotective circulating cytokines are  
81 unclear, several of them are expressed in, and can be secreted from, skeletal muscle<sup>18,31-33</sup>.  
82 Indeed, skeletal muscle acts as an endocrine organ secreting a myriad of bioactive factors  
83 collectively known as myokines that induce metabolic changes in distant tissues like liver<sup>34</sup>,  
84 adipose tissue<sup>35</sup>, and even the CNS<sup>32</sup>. Interestingly, skeletal muscle function has also arisen as  
85 a key predictor for phenotypic and clinical outcomes in age-associated neurodegenerative  
86 diseases, including Alzheimer's Disease (AD) and Parkinson's Disease (PD)<sup>36,37</sup>. Thus, this  
87 muscle-to-brain signaling axis has been proposed to have important implications for CNS aging  
88 and age-associated neurodegenerative disease<sup>32,38,39</sup>. Consistent with this hypothesis, we were  
89 the first to uncover a novel mechanistic basis for motor neuron disease in the polyglutamine  
90 disease spinal and bulbar muscular atrophy (SBMA), where disruption of skeletal muscle  
91 autophagy<sup>40</sup> initiates the pathogenic cascade that culminates in neuronal toxicity and death<sup>41,42</sup>.  
92 Altogether, this suggests that maintenance of skeletal muscle proteostasis may promote  
93 neurotrophic signaling in the aging brain, thus providing positive systemic benefits against age-  
94 associated CNS decline.

95 Skeletal muscle autophagy is regulated in part by the basic Helix Loop Transcription Factor E-B  
96 (TFEB), a master regulator of a novel signaling axis that integrates cellular metabolism and  
97 autophagy<sup>43-45</sup>. TFEB expression and function are strongly induced in skeletal muscle during low  
98 nutrient conditions<sup>16</sup> and after exercise<sup>7</sup>, suggesting that TFEB signaling is engaged in skeletal  
99 muscle in response to interventions with documented neuroprotective effects on the aging<sup>46,47</sup>  
100 and neurodegenerative disease-afflicted CNS<sup>47-50</sup>. Here we report the generation of a novel  
101 transgenic mouse with enhanced muscle proteostasis via moderate overexpression of TFEB.  
102 We have discovered that the resulting enhanced skeletal muscle proteostasis function can  
103 significantly ameliorate proteotoxicity, reduce neuroinflammation and promote transcriptional  
104 remodeling of the aging CNS, preserving cognition/memory in aging mice. Enhancing skeletal  
105 muscle proteostasis also reduced accumulation of tau-associated pathological hallmarks and  
106 activation of astrocytes and microglia in a mouse model of tau pathology and was accompanied  
107 by increased secretion of CNS-targeting circulating factors from skeletal muscle. Our results  
108 implicate maintenance of skeletal muscle proteostasis throughout aging to direct regulations of

109 the aging CNS metabolism and function, and suggest that skeletal-muscle originating factors  
110 may act as novel therapeutic targets against age-associated neurodegenerative diseases.

## 111 RESULTS

### 112 TFEB Overexpression Activates Proteostasis-Related and Metabolism-Associated 113 Networks in Skeletal Muscle

114 We derived a novel line of conditional transgenic mice carrying the  $\beta$ -actin promoter in  
115 combination with the CMV enhancer (CAGGS) and with a floxed 3x-FLAG-eGFP STOP  
116 cassette placed just 5' to a 3x-FLAG-human *Tcfef* transgene ("fxSTOPTFEB" mice), allowing  
117 for tissue-specific expression of TFEB in the presence of Cre-recombinase (**Figure 1a**). To drive  
118 expression of the TFEB transgene specifically in skeletal muscle, we crossed fxSTOP-TFEB  
119 mice with Human Skeletal Actin (HSA)-Cre mice to achieve widespread expression of Cre-  
120 recombinase in cells of the myogenic lineage<sup>51</sup>. The resulting cTFEB;HSAcre bigenic mice  
121 exhibited muscle-specific expression of 3x-FLAG-TFEB (**Figure 1b**). Indeed, we detected  
122 significant transcriptional increases in *Tcfef* in skeletal muscle RNA lysates from young (6  
123 months) and aged (24 months) cTFEB;HSAcre transgenic mice compared to their littermate  
124 controls (**Supplementary Figure 3a-b**). We also confirmed myonuclear expression of TFEB in  
125 cTFEB;HSA-Cre muscle by immunohistochemistry, which revealed FLAG-positive  
126 immunostaining in the myofiber periphery (**Supplementary Figure 1b**).

127 We confirmed TFEB overexpression exclusively in skeletal muscle by multiple approaches.  
128 First, we did not detect exogenous expression of 3x-FLAG-TFEB in other highly metabolic  
129 tissues, including brown adipose tissue (**Supplementary Figure 2a**), liver (**Supplementary**  
130 **Figure 2b**) and the CNS (**Supplementary Figure 3**). Indeed, at all ages examined, we detected  
131 no differences in *Tcfef* transcription in hippocampal lysates regardless of their genotype  
132 (**Supplementary Figure 3a-b**). Consistent with these findings, we also did not detect  
133 expression of exogenous 3x-FLAG-TFEB in hemibrain protein lysates (**Supplementary Figure**  
134 **3c**). We also confirmed robust activation of a red fluorescent protein reporter in skeletal muscle  
135 of TdTomato Ai9;HSA-Cre transgenic mice, which express robust tdTomato fluorescence  
136 following Cre-mediated recombination (**Supplementary Figure 1a**)<sup>52</sup>. Notably, there was no  
137 detectable TdTomato fluorescence in the CNS (**Supplementary Figure 3d**), including the  
138 hippocampus (**Supplementary Figure 3d, insets**), of the same individuals, consistent with the  
139 muscle-restricted specificity of this Cre-loxP-ON approach. Overall, this data confirm previous

140 reports of striated muscle-specific Cre-mediated recombination using the HSA-Cre transgenic  
141 line<sup>51</sup>, and demonstrate expression of exogenous *Tcfefb* only in skeletal muscle of  
142 cTFEB;HSACre transgenic mice.

143 TFEB directly regulates transcription of multiple lysosomal and autophagy-associated genes  
144 <sup>43,45</sup>, promoting lysosomal function and autophagy activation in vivo<sup>7,16</sup> and in vitro<sup>43,45</sup>. We  
145 confirmed functional activation of TFEB-dependent transcription in cTFEB:HSA-Cre bigenic  
146 muscle, using our previously reported TFEB-responsive muscle gene targets<sup>40</sup> including *Lamp1*  
147 (an essential lysosomal structural protein), *Ctsd* (Cathepsin D, a lysosomal protease) and *Atg5*  
148 (a key regulator of autophagy initiation) (**Supplementary Figure 4a**). Immunoblotting studies  
149 also revealed significant increases of TFEB transcriptional targets at the protein level, including  
150 LAMP1 and CTSD (**Supplementary Figure 4b**). These findings confirm physiologically  
151 significant increases in TFEB- expression and TFEB-dependent transcription in skeletal muscle  
152 of cTFEB:HSA-Cre mice.

153 To examine the overall changes in the skeletal muscle protein landscape in response to TFEB  
154 overexpression, as well as any differences in protein expression profiles associated with aging,  
155 we performed proteome profiling of young and aged, control and cTFEB;HSACre quadriceps  
156 skeletal muscle. Differential abundance analysis of species revealed around 1000 proteins  
157 associated with TFEB expression in young (6-month-old) skeletal muscle (**Figure 1c**). Of these,  
158 650 (65%) were significantly overrepresented and 35% (350) were underrepresented with  
159 TFEB-overexpression. At 18 months of age, a time point where age-associated dysfunction is  
160 prevalent in murine skeletal muscle <sup>53</sup>, we detected around 400 differentially expressed proteins  
161 in TFEB-expressing skeletal muscle (**Figure 1d**). Of these, 83% (250) were significantly  
162 enriched and 17% (50) were significantly decreased in cTFEB;HSACre transgenic muscle.  
163 Importantly, at both ages examined, TFEB remained among the top 5 most highly expressed  
164 proteins (**Figure 1c-d**), confirming maintenance of exogenous skeletal muscle TFEB expression  
165 across ages.

166 To visualize the key networks of proteins associated with TFEB-overexpression, we performed  
167 a functional enrichment analysis on all overexpressed proteins using the STRING protein-  
168 protein interaction network<sup>54</sup> (**Figure 1e and Supplementary Figure 4**). Using TFEB as our  
169 'bait' for functional connectivity nodes, we identified two clear interaction networks: one  
170 associated with lysosomal biogenesis and function (**Figure 1e, blue**) and a second one  
171 associated with key skeletal muscle proteostasis and metabolic signaling pathways, including

172 mTOR, AKT and GSK3 $\beta$  (**Figure 1e, green**). Both of these nodes are key elements of the  
173 CLEAR signaling network controlled by TFEB-mediated transcription<sup>44,45</sup>, were previously  
174 reported to be transcriptionally elevated in skeletal muscle after TFEB overexpression<sup>7</sup>, and are  
175 central regulators of age-associated signaling<sup>1</sup>.

176 Next, we grouped all overrepresented proteins using Kyoto Encyclopedia of Genes and  
177 Genomes (KEGG) enrichment analysis. We detected multiple central proteostasis categories  
178 heavily overrepresented in TFEB-overexpressing skeletal muscle, including Hypoxia-inducible  
179 factor 1 (HIF-1) signaling (such as hexokinase 2, Pyruvate Dehydrogenase, Ribosomal Protein  
180 S6 Kinase B2 and Lactate Dehydrogenase B) and proteasome and autophagy/lysosomal  
181 function categories (including cathepsin B (CTSB), D and K, mTOR, BNIP3 and LAMP1)  
182 (**Figure 1f**), consistent with our targeted immunoblot studies (**Supplementary Figure 4**).  
183 Importantly, this enrichment in proteostasis categories and TFEB-regulated nodes of signaling  
184 was maintained in aging skeletal muscle (**Figure 1f and Supplementary Figure 5**).

185 TFEB overexpression has been reported to reactivate declining proteostasis associated with  
186 age- or disease-associated impaired lysosomal function<sup>40,55,56</sup>. We wondered if the enrichment  
187 in proteostasis pathways and proteostasis signaling observed in aged skeletal muscle with  
188 TFEB-overexpression would result in functional outcomes reflective of proteostasis  
189 maintenance. Consistent with this hypothesis, analysis of autophagy marker LC3, which is  
190 cleaved and post-translationally modified into its mature form (LC3-II) upon autophagy  
191 induction<sup>57</sup>, revealed a significant increase in LC3-II:LC3-I ratio in quadriceps muscle of 12  
192 month-old cTFEB:HSA-Cre mice, suggesting increased accumulation of autophagosomes  
193 (**Supplementary Figure 6a**). Another approach to examining the age-associated decline in  
194 proteostasis is the examination of poly-ubiquitinated and P62-labeled aggregates, usually  
195 representing cytoplasmic accumulations of damaged proteins<sup>4</sup>. We found a marked  
196 accumulation of P62/SQSTM1 and ubiquitin-positive aggregates of varying size in middle-aged  
197 control skeletal muscle (**Supplementary Figure 6b, top**), indicating a progressive increase in  
198 protein damage and a decrease in the turnover of skeletal muscle proteins<sup>1,21,58</sup>. Strikingly,  
199 these features were nearly absent in skeletal muscle sections from age- and littermate-matched  
200 cTFEB:HSA-Cre mice (**Supplementary Figure 6b, bottom**). This suggests that in addition to  
201 activating lysosomal biology and function, expression of TFEB in skeletal muscle results in  
202 functional activation of autophagy, reducing the accumulation of age-associated protein  
203 inclusions.



204 Additional functional categories enriched in our proteomics analysis related to cellular  
205 metabolism and mitochondrial function, including thermogenesis, oxidative phosphorylation and  
206 fatty acid metabolism. Notably, several signaling pathways shown to decline during aging,  
207 including Insulin-IGF1-signaling (IIS) and AMPK signaling<sup>1</sup>, were significantly enriched in  
208 cTFEB;HSACre transgenic muscle (**Figure 1f**). We also detected multiple hits for amino acid  
209 metabolism pathways, such as catabolism of branched-chain amino acids (BCAAs), including  
210 valine, leucine and isoleucine metabolism. These changes were still evident in our aged cohorts  
211 (**Figure 1f**), suggesting preservation of multiple key hallmarks of aging (i.e. proteostasis,  
212 metabolism, and mitochondrial function) via maintenance of TFEB-associated signaling in aging  
213 skeletal muscle. In agreement with this, analysis of skeletal muscle of 12-month-old control mice  
214 showed marked accumulation of age-associated histopathological markers, including fiber  
215 decompaction, intrafibrillary myonuclei and multilamellar structure accumulation  
216 (**Supplementary Figure 7a, top**). Remarkably, these features were nearly absent in skeletal  
217 muscle sections from age- and littermate-matched cTFEB:HSA-Cre mice (**Supplementary**  
218 **Figure 7a, bottom**). Instead, aging cTFEB;HSACre muscle retained compact fiber organization  
219 and perifibrillar myonuclei and did not exhibit any multilamellar structures. Furthermore, we  
220 also detected reduced expression of muscle stress factor *Mstn* (myostatin)<sup>59</sup> (**Supplementary**  
221 **Figure 7b**) and increased expression of metabolic modulator *Fndc5*<sup>59</sup> in aged cTFEB;HSACre  
222 skeletal muscle (**Supplementary Figure 7c**). Our results suggest maintenance of functional  
223 proteostasis via TFEB overexpression throughout aging has multiple geroprotective benefits in  
224 skeletal muscle.

225 The skeletal muscle 'secretome' (the totality of released organic and inorganic molecules  
226 released from muscle resident cells) is highly dynamic, responding to physiological and  
227 pathophysiological stimuli<sup>59,60</sup> and potentially also changing with age<sup>59</sup>. To directly examine any  
228 changes to the skeletal muscle protein-based secretome associated with TFEB-overexpression,  
229 we pursued additional *in silico* analysis on our proteomics cohorts to identify unique age- and  
230 genotype-associated signatures of potentially secreted proteins<sup>61</sup> differentially expressed in  
231 cTFEB;HSACre skeletal muscle. Using the Vertebrate Secretome Database (VerSeDa)<sup>61</sup>, we  
232 identified multiple proteins with predicted secreted profiles to be enriched in young and aged  
233 TFEB-expressing skeletal muscle (**Figure 2a**). Some secreted proteins exhibited upregulation  
234 (e.g., nucleobindin-1, angiopoietin-related protein 1) or down-regulation (collagen alpha-1 (I)  
235 chain), only in young cTFEB;HSACre muscle. Others remained up-regulated at both ages in  
236 cTFEB;HSACre-expressing muscle, (prosaposin and mammalian endymin-related protein 1

237 and dehydrogenase/ reductase SDR family member 7C), highlighting the dynamic nature of the  
238 skeletal muscle ‘secretome’ throughout aging. CTSB, a previously documented muscle-  
239 originating secreted factor with known CNS-targeting effects<sup>33</sup> and a known target of TFEB-  
240 dependent transcription<sup>45</sup> was our top hit at both ages examined. We validated the predicted  
241 increase in *Ctsb* at the transcriptional level in a separate cohort of cTFEB;HSACre mice (**Figure**  
242 **2c**). Interestingly, while we detected no significant differences in total or pro-enzyme levels of  
243 CTSB, we determined a specific increase in mature CTSB isoforms (**Figure 2b**). CTSB  
244 undergoes auto –proteolytic activation within the acidic environment of late  
245 endosomes/lysosomes, and mature CTSB is then secreted via lysosomal exocytosis.  
246 Consistent with this enrichment on potentially secreted CTSB isoforms, we detected significantly  
247 increased levels of circulating CTSB in the serum of cTFEB;HSACre mice (**Figure 2d**). Given  
248 the potent remodeling of the lysosomal network associated with activation of TFEB-mediated  
249 transcription<sup>43-45</sup>, our data suggests that overexpression of TFEB in skeletal muscle drives  
250 increased expression and secretion of mature CTSB, a CNS targeting-factor, into circulation.

### 251 **Skeletal Muscle Over-expression of TFEB decreases neuroinflammation markers and** 252 **lipofuscin accumulation in the aged CNS.**

253 One of the key drivers of age-associated cognitive decline is neuroinflammation<sup>2</sup>, the chronic  
254 activation of glial cells towards pro-inflammatory phenotypes in the CNS. To examine the effect  
255 of increased peripheral proteostasis on the aging brain, we assessed the transcriptional and  
256 functional status of known inflammatory markers in the CNS of aged mice (20+ months), an age  
257 when global decreases in proteostasis and increases in pro-inflammatory signaling are  
258 detectable in most tissues<sup>1,62</sup>, including the CNS<sup>1,2</sup>.

259 Using standard immunostaining approaches to quantify cell shape and morphology, we did not  
260 detect any changes in microglia or astrocyte number, volume or ramification in the dentate  
261 gyrus of aged cTFEB;HSACre transgenic mice (**Supplemental Figure 8a-b**). However, total  
262 hippocampal mRNA levels of pro-inflammatory cytokines previously reported to mediate  
263 microglial responses to inflammation including *Ccl2* (also known as monocyte chemotactic  
264 protein-1, MCP1)<sup>63</sup> and *NFκB*<sup>64</sup> were significantly reduced in the hippocampus of aging female  
265 cTFEB;HSACre transgenic mice(**Figure 3a-b**). Interestingly, levels of *IL6* (interleukin 6) were  
266 significantly elevated in the same groups (**Figure 3c**). Although commonly considered a pro-  
267 inflammatory factor, IL-6 also appears to have seemingly contradictory neurotrophic effects in  
268 the CNS, increasing neurogenesis<sup>65</sup> and stimulating axon regeneration<sup>66</sup>. Consistent with these

269 findings, we also detected significantly higher levels of expression of *Bdnf* (Brain Derived  
270 Neurotrophic Factor) in hippocampal lysates from middle-aged (12-month old) female mice  
271 (**Figure 3d**). Overall, these results suggest a shift in the cytokine transcriptional landscape of  
272 the aging hippocampus with upregulated peripheral proteostasis to an overall reduction of anti-  
273 inflammatory phenotypes.

274 Accumulation of lipofuscin, a non-degradable intracellular auto-fluorescent polymer, becomes  
275 prominent in the aging brain, likely reflecting an age-associated decline in basal CNS  
276 autophagy<sup>1</sup>. We examined the clearance capabilities of the aging CNS by indirect  
277 immunofluorescence of lipofuscin granules in brain sections of aged (21-24 months-old) control  
278 and cTFEB;HSACre mice. While we detected striking lipofuscin granule accumulation in  
279 several brain regions of aged control mice, including the hippocampus, age- and littermate-  
280 matched cTFEB;HSACre mice revealed a decrease in lipofuscin deposition, particularly in the  
281 dentate gyrus of the female (**Figure 3e**) and male hippocampus (**Supplemental Figure**  
282 **8c**). Taken together, these results indicate that maintenance of skeletal muscle proteostasis  
283 throughout aging reduces neuroinflammation and promotes maintenance of protein quality  
284 control in the aging hippocampus of cTFEB;HSACre transgenic mice. Importantly, this occurs in  
285 the absence of detectable exogenous TFEB expression in the CNS (**Supplemental Figure 3**),  
286 suggesting an independent mechanism of muscle-to-brain communication underlying the  
287 observed neuroprotective effects.

### 288 **Improved Performance in Neurocognitive Testing of Aging cTFEB;HSACre Mice.**

289 Geroprotective interventions that target the CNS can have direct effects on brain plasticity, with  
290 well-documented benefits on hippocampal-dependent cognitive functions<sup>6,28,39,40</sup>. Given the  
291 maintenance of proteostasis, reduction in neuroinflammation and increase in *Bdnf* expression  
292 observed in the aging hippocampi of cTFEB;HSACre transgenic mice, we pursued  
293 neurocognitive testing in aged (16-18 months-old) control and cTFEB;HSACre mice. First, we  
294 confirmed no difference in visual performance (optomotor test) (**Supplemental Figure 9a**), or  
295 motor activity (ambulatory, rearing or center activity, as well as distance traveled)  
296 (**Supplemental Figure 9b**) between aged control and cTFEB;HSACre cohorts. We then  
297 evaluated spatial learning and memory using the Barnes maze task, a hippocampal working  
298 memory test known to be sensitive to aging in mice. We documented significantly faster escape  
299 times (**Figure 3f**) and a significant decrease in the number of errors per trial (**Figure 3g**) in  
300 aged cTFEB;HSACre mice in comparison to controls. Indeed, by the last

301 trial, cTFEB;HSACre mice escaped the maze twice as quickly as control mice. In the novel  
302 object recognition task – an independent behavioral test of hippocampal recognition  
303 memory – we also found that aged cTFEB;HSACre mice exhibited a significantly greater  
304 number of contacts with the novel object compared to controls during the test  
305 phase (**Figure 3h**). Indeed, aged cTFEB;HSACre mice have a 15% higher preference for the  
306 novel object relative to their age-matched littermate controls (**Figure 3i**). Hence, these results  
307 provide exciting evidence for a pronounced improvement in neural function in the aging brain  
308 of cTFEB;HSACre mice with enhanced muscle proteostasis.

### 309 **Neurotrophic Transcriptome Changes in the Hippocampi of cTFEB;HSACre transgenic** 310 **mice.**

311 To determine the molecular basis of the benefits of enhancing skeletal muscle proteostasis on  
312 the aging CNS, we performed unbiased transcriptome analysis on hippocampal RNAs isolated  
313 from young (6 months, adult) and aged (21+ months) mice. By this time point, aging animals  
314 have increased neuroinflammation (**Figure 3a**), have evident CNS proteostasis dysfunction  
315 (**Figure 3e**), and display deficits in cognitive function (**Figure 3g-i**), phenotypes that are  
316 significantly improved in cTFEB;HSACre mice.

317 Bulk RNA-Seq analysis of hippocampal RNA lysates revealed robust changes in gene  
318 expression in young cTFEB;HSACre transgenic mice compared to their age- and sex-matched  
319 littermate controls (**Figure 4 and Supplemental Figure 10**). We detected 1194 differentially  
320 expressed genes, (809 up-regulated and 385 down-regulated) in the hippocampus of young  
321 female mice with enhanced skeletal muscle proteostasis (**Figure 4a**). To identify specific neural  
322 signaling functions that could be contributing to the neuroprotective effects of enhancing skeletal  
323 muscle proteostasis, we performed GO Enrichment analysis of all differentially expressed  
324 genes. We found that key categories associated with synaptic function, including ion- and  
325 voltage-gated channel activity, as well as synapse and synaptic membrane categories, were  
326 significantly enriched in the hippocampus of female cTFEB;HSACre mice (**Figure 4c**).

327 Enrichment analysis of differential gene expression (KEGG) revealed additional categories  
328 associated with neural function, including oxytocin signaling, cAMP signaling, Hippo signaling  
329 and gap junctions (**Figure 4e**). Furthermore, metabolic and functional pathway analysis  
330 (Reactome) of differentially expressed genes in the hippocampus after enhancing skeletal  
331 muscle proteostasis also identified key categories known to regulate cognitive plasticity,

332 including neuronal system, GPCR signaling, voltage gate potassium channels, and synaptic  
333 connectivity (Phase 1 - rapid depolarization and Phase 2 – plateau) (**Supplementary Figure 10**).

334 Consistent with our biochemical and functional findings suggesting increased neuroprotective  
335 benefits in cTFEB;HSACre transgenic mice (**Figure 3**), we found that these transcriptional  
336 changes modulating synaptic function-associated pathways are largely preserved in the aging  
337 hippocampus of cTFEB;HSACre transgenic mice (**Figure 4b,d,f**). Indeed, KEGG functional  
338 pathways enriched in the hippocampus of aging cTFEB;HSACre female mice included key  
339 categories associated with preservation of neuronal activity and cognitive function, including  
340 axon guidance, HIF-1 signaling, AMP signaling and PI3-Akt signaling (**Supplemental Figure**  
341 **10**).

342 Analysis of the functional enrichment of top differentially expressed genes in the hippocampus  
343 of young male cTFEB;HSACre transgenic mice revealed a different pattern, (1797 differentially  
344 expressed genes, 928 up-regulated and 869 down-regulated), which associated mostly with  
345 multiple mitochondria or ribosomal/transcription targeting pathways (**Supplemental Figure 11**).  
346 This included mitochondrial respiratory chain, mitochondrial protein complexes, electron  
347 transport chain and ATP metabolic processes (**Supplemental Figure 11**). Non-sense mediated  
348 decay, metabolism of RNA and translation were amongst the top enriched metabolic pathways  
349 identified in male groups (**Supplemental Figure 12**). Consistent with this, KEGG analysis  
350 revealed the largest enriched functional pathways were ribosomes and oxidative  
351 phosphorylation (**Supplemental Figure 12**). We only detected 539 differentially expressed  
352 genes in the hippocampus of aged male cTFEB;HSACre transgenic mice (279 up-regulated,  
353 261 down-regulated) (**Supplemental Figure 12**), with only mild significance on functional  
354 pathways. Altogether, these results suggest important transcriptional remodeling of the CNS in  
355 response to enhanced skeletal muscle proteostasis, that they reflect biological pathways  
356 essential for neuronal signaling and cognitive function and that these changes are preserved  
357 throughout aging.

### 358 **Enhanced skeletal muscle proteostasis reduces accumulation of hyperphosphorylated** 359 **tau and microglial activation in a mouse model of tau pathology.**

360 To assess the potential neuroprotective effects of enhancing skeletal muscle proteostasis in the  
361 context of age-associated neurodegenerative disease pathologies, we derived cTFEB;HSACre  
362 transgenic mice in the MAPT P301S background. This is a well-known model of neurofibrillary

363 tangle toxicity, a hallmark of AD and related tauopathies<sup>67</sup>, and is characterized by prominent  
364 hippocampal hyperphosphorylated tau accumulation and neuroinflammation, including  
365 microgliosis and astrocyte reactivity<sup>67</sup>. We confirmed muscle-restricted 3x-FLAG-TFEB  
366 overexpression in skeletal muscle lysates from MAPT P301S /cTFEB;HSACre mice but no 3x-  
367 FLAG-TFEB expression in their MAPT P301S littermates (**Supplemental Figure 13a**). We  
368 noted that at 9 months of age, when there is robust accumulation of hyperphosphorylated tau  
369 and neuroinflammation, and at the onset of behavioral phenotypes in this mouse model<sup>67</sup>, we  
370 detected a significant reduction in the total fluorescence counts of hyperphosphorylated tau  
371 (AT8 phospho-tau antibody) in the dentate gyrus of cTFEB;HSACre;P301S mice compared with  
372 single transgenic P301S littermate controls (**Figure 5a**). Immunoblotting analysis confirmed a  
373 reduced phosphorylated tau to total tau ratio in whole hippocampal lysates of MAPT P301S  
374 transgenic mice with enhanced skeletal muscle proteostasis (**Supplemental Figure 13b**). More  
375 so, there was also a significant reduction in the levels of 'intracellular tau' accumulating around  
376 hippocampal cell bodies (**Figure 5a, insets**), suggesting reduced accumulation of toxic tau  
377 species and aggregates<sup>68</sup> in the hippocampi of cTFEB;HSACre:P301S transgenic mice.

378 Glial cells (such as astrocytes and microglia), are key responders during neuroinflammation,  
379 and have been shown to undergo key morphological changes<sup>69</sup> including changes in  
380 ramification and cellular process complexity<sup>69</sup>, which are believed to reflect reduced immune  
381 surveillance activity<sup>70</sup> and increased reactivity phenotypes<sup>71</sup>. Consistent with previous reports in  
382 this model<sup>67,72</sup>, we confirmed significant increases in the number of GFAP-positive astrocytes,  
383 as well as increases in the volume of Iba1-positive microglia in the hippocampus of 9-month-old  
384 MAPT P301S mice (**Figure 5b**). Strikingly, we noted significant reductions in both of these pro-  
385 inflammatory associated morphometric parameters in the hippocampus of MAPT  
386 P301S;cTFEB;HSACre littermates (**Figure 5b and Supplemental Figure 13 c-d**), suggesting  
387 overall reduced neuroinflammation during symptomatic disease stages through activation of  
388 skeletal muscle proteostasis.

### 389 **Enhancing Skeletal Muscle Proteostasis Promotes Neurotrophic Signaling and Reduces** 390 **Hippocampal Neuroinflammation in MAPT P301S Transgenic Mice.**

391 To gain more precise insights into neurodegenerative disease-relevant transcriptional changes  
392 in the hippocampus of MAPT P301S;cTFEB;HSACre mice, we used the Nanostring nCounter®  
393 AD panel. This platform directly assesses the expression of 770 genes curated from human and  
394 pre-clinical models of AD and robustly captures disease-relevant signatures and their

395 modifications after pre-clinical interventions<sup>73</sup>. Using this approach, we found a total of 79  
396 differentially expressed genes in MAPT P301S;cTFEB;HSACre hippocampi compared to their  
397 littermate MAPT P301S+ controls (**Figure 6a-b**). Interestingly, most differentially regulated  
398 genes were downregulated (76 of 79), consistent with their identity as transcriptional drivers of  
399 disease<sup>73</sup>. Many of these transcripts are associated with microglial activation (including *Rhoc*,  
400 *Bcar3* and *Alcam*), markers of neuronal function (*Gdap111*), phospholipid remodeling (*Ano6*),  
401 growth factor signaling (*Vgf*), endothelial cell migration and matrix adhesion (*Rras*) and guanine  
402 nucleotide exchange factors (*Dock3*). Interestingly, multiple down-regulated genes were  
403 associated with novel variants and loci associated with increased polygenic neurodegenerative  
404 disease risk (*Prkd3*<sup>74</sup>, *Bcar3*<sup>75</sup>, *Nfia*<sup>76</sup>, *Elovl7*<sup>77</sup>) as well as predictors of the rate of cognitive  
405 decline in AD (*Hecw1*<sup>78</sup>). Expression of *Arhgdib*, recently identified as a potential novel  
406 biomarker for tau neurofibrillary tangle accumulation and neuropathological Braak stage in  
407 human entorhinal cortex<sup>79</sup>, was also significantly reduced. Similarly, *Pbxip1*, another  
408 significantly downregulated marker, has been found to be associated with phosphorylated-tau  
409 and A $\beta$ <sub>1-40</sub> levels in the human temporal cortex<sup>80</sup>. Additional transcriptional reductions of  
410 significance include genes of unknown function but classified as transcriptional identifiers of AD  
411 progression (*Ptprn*, *Cpne2*, *Eri2*)<sup>73</sup>. Functional annotation of the differentially expressed co-  
412 expression/functional clusters revealed significant reductions in the nCounter microglial  
413 activation module (**Figure 6c**) in the hippocampi of 9 month old female MAPT P301S  
414 cTFEB;HSACre mice compared with P301S littermates, consistent with increased  
415 neuroprotection and reduced neuroinflammation in the hippocampus (**Figure 5**). Although no  
416 other functional clusters displayed statistically significant differences, multiple categories  
417 displayed interesting trends, suggesting a general modification of AD-associated transcriptional  
418 profile in the hippocampus in response to enhanced muscle proteostasis. This included changes  
419 in lipid metabolism (**Figure 6d**) and trophic factors (**Figure 6e**) as well as transcription/splicing,  
420 axon guidance and others (**Supplementary Figure 14**). Similar to what we observed in our  
421 healthy aging groups (**Figure 3d**), we also confirmed re-activation of neurotrophic signaling in  
422 the hippocampus of MAPT P301S cTFEB;HSACre symptomatic mice, measured by the  
423 corrections of declining expression levels of neurotrophic factors *Bdnf* and *Fndc5* (**Figure 6f-**  
424 **g**)<sup>38,81</sup>. These provocative results suggest that enhanced skeletal muscle proteostasis modifies  
425 the accumulation of pathogenic tau isoforms and reduces neuroinflammation in the  
426 hippocampus of P301S mice via transcriptional remodeling and activation of neurotrophic  
427 signaling in the CNS.

## 428 DISCUSSION

429 Skeletal muscle comprises roughly 40% of the total body mass in a healthy young adult human  
430 and is highly susceptible to age-associated proteostatic decline<sup>58,82</sup>. Muscle autophagy  
431 facilitates metabolic reprogramming and mitochondrial quality control during conditions of high  
432 metabolic demand<sup>16,83,84</sup> and is also required to maintain muscle health and muscle mass<sup>85,86,87</sup>.  
433 Skeletal muscle health has been linked to multiple chronic age-associated conditions, including  
434 diabetes<sup>88</sup>, cardiovascular disease<sup>89</sup> and, more recently, neurodegenerative diseases<sup>36,37,39</sup>. In  
435 agreement with this, muscle-originating circulating factors (myokines) appear to play central  
436 roles in regulating CNS health and function. For example, Amyrel amylase, a skeletal muscle  
437 secreted protein with maltose producing function, was recently identified as a key proteostasis  
438 stress-induced myokine with CNS targeting effects in *Drosophila Melanogaster*<sup>18</sup>. Consistent  
439 with our own findings here, muscle-specific *amyrel* overexpression improves proteostasis and  
440 prevents neurodegeneration induced by aggregation-prone disease-associated pathogenic  
441 proteins in the fly brain and retina<sup>18</sup>. Another example is Fibronectin-domain III containing 5  
442 (FNDC5), a glycosylated type 1 membrane protein that is highly enriched in skeletal muscle.  
443 FNDC5 can be proteolytically cleaved into an N-terminal fragment known as irisin, which is then  
444 released into circulation<sup>88</sup>. Recent studies have demonstrated that peripheral delivery of irisin  
445 reduces neuroinflammation and rescues cognitive decline in two separate mouse models of AD,  
446 and is a central modulator of cognitive function<sup>32</sup>. Likewise, the lysosomal protease CTSB is  
447 secreted from skeletal muscle into circulation in response to exercise and is required for the full  
448 manifestation of exercise-associated benefits on the CNS, including increases in the levels of  
449 hippocampal BDNF and re-activation of neurogenesis<sup>33</sup>. This suggests that maintenance of the  
450 skeletal muscle secretome may be central to the regulation of CNS aging and disease.

451 Here, and for the first time in mammals, we provide direct evidence demonstrating the CNS  
452 benefits of maintaining skeletal muscle proteostasis throughout aging. We find that life-long mild  
453 overexpression of TFEB in skeletal muscle in cTFEB;HSACre transgenic mice reduces the  
454 development of age-associated biochemical hallmarks in the hippocampus, ultimately  
455 preserving cognitive function in the aging brain. Importantly, we document that these benefits  
456 occur without any detectable expression of our transgene in the CNS, suggesting that the  
457 observed reductions in proteotoxicity and neuroinflammation, as well as the improved  
458 neurocognitive performance of aged cTFEB;HSACre mice are due to the overexpression of  
459 TFEB solely in the skeletal muscle.



460 We also report significant transcriptional remodeling of the hippocampus in response to  
461 enhanced skeletal muscle proteostasis. In-depth transcriptional studies of the aging mouse  
462 brain point to key metabolic pathways, including the dysregulation of ion homeostasis,  
463 disruption of neurotransmission and ribosome biogenesis as key biological process exhibiting  
464 differential regulation with aging<sup>2,90</sup>. In particular, multiple studies have shown that down-  
465 regulated genes during aging are enriched with genes related to synaptic transmission and  
466 plasticity (reviewed here<sup>3</sup>). It is particularly interesting that manipulation of skeletal muscle  
467 proteostasis modulates expression of similar key functional enrichment categories in the aging  
468 hippocampus in a sex-dependent manner. While it is unclear whether these differential  
469 responses between male and female hippocampi to the enhancement of skeletal muscle  
470 proteostasis reflect local differences in the CNS or peripheral differences in the expression,  
471 secretion or trafficking of circulating signals, they underscore the fundamental need to examine  
472 sex differences contributing to the biology of aging.

473 Tauopathies are clinically, biochemically and morphologically heterogeneous neurodegenerative  
474 diseases characterized by the deposition of abnormal aggregates of tau in the brain. The MAPT  
475 P301S model recapitulates multiple aspects of tauopathies, including microglial activation,  
476 filamentous tau inclusions and synapse loss<sup>67</sup>. Our studies indicate that enhancing skeletal  
477 muscle proteostasis has significant benefits on multiple markers of gliosis, reducing the number  
478 of astrocytes and the volume of microglia present in the hippocampus. Glial cell size and  
479 morphology have been directly linked to their inflammatory status, suggesting that enhancing  
480 muscle proteostasis in MAPT P301S transgenic mice reduces microglial and astrocyte  
481 activation, ultimately reducing neuroinflammation. Indeed, we also detected significantly  
482 reduced transcriptional activation of the nCounter AD microglial activation panel. This highlights  
483 both the robust pro-inflammatory state associated with tau pathogenesis, as well as the  
484 intriguing possibility that manipulation of skeletal muscle proteostasis pathways may represent a  
485 novel target for modulation of neuroinflammation in the context of neurodegenerative disease.

486 Peripheral circulating factors have recently arisen as novel regulators of CNS metabolism and  
487 function<sup>18,29,32,33,39</sup>. Although the precise mechanisms underlying the neurotrophic and  
488 neuroprotective effects of these factors remain poorly understood, most of them have been  
489 reported to work through inhibition of neuroinflammation<sup>23,27,28,32</sup>, consistent with our findings in  
490 aging and MAPT P301S models. Through our proteomics analysis, we identified multiple  
491 differentially expressed proteins in TFEB-overexpressing skeletal muscle that are predicted to  
492 be secreted through classical and non-classical mechanisms. Interestingly, our highest

493 expressed factor was CTSB, and we confirmed higher levels of circulating CTSB in the serum of  
494 cTFEB;HSACre transgenic mice. CTSB has been proposed to cross the blood-brain barrier<sup>33</sup>.  
495 Furthermore, administration of recombinant CTSB to adult hippocampal progenitor cells in vitro  
496 increases levels of BDNF<sup>33</sup>. In vivo, extracellular CTSB remodels the extracellular matrix<sup>91</sup>,  
497 enhancing axonal outgrowth through degradation of chondroitin sulfate<sup>92,93</sup>. Furthermore, high  
498 CTSB expression levels in the hippocampus has been reported in low-anxiety mouse lines<sup>94,95</sup>,  
499 suggesting that CTSB may play important roles in maintaining neuronal homeostasis in brain  
500 regions with high relevance for both aging and age-associated neurodegenerative disease. Our  
501 results imply that additional research into the role and function of circulating proteases and  
502 their ability to remodel the CNS may be warranted.

503 Over the last ten years, there has been growing evidence that suggests prominent contributions  
504 of the periphery to the etiology of neurodegenerative diseases. Our discovery that skeletal  
505 muscle proteostasis can be a crucial site for regulation of CNS health and function provides  
506 compelling evidence for a new therapeutic delivery avenue into the brain, providing a currently  
507 unexplored new diagnostic and therapeutic intervention site (i.e. Skeletal muscle) for  
508 lengthening cognitive healthspan.

509

## 510 **METHODS**

### 511 *Generation of fxSTOP-TFEB transgenic mice.*

512 We used a pCMV-human TFEB expressing vector from Origene (clone # sc122773), used  
513 previously<sup>40</sup>. We cloned a 3x-FLAG fragment via insertion into the Acc65I and Pac1 restriction  
514 sites of the targeting vector. The fxSTOP-TFEB vector was generated in multiple steps, as  
515 follows: (1) 5' and 3' targeting arms were inserted by PCR onto the ends of a minimal 1.8 kb,  
516 chloramphenicol-resistant vector; (2) an ampicillin resistance cassette was cloned into the MluI,  
517 XmaI sites of the targeting vector; (3) an 1.1 kb fragment encoding the actin promoter, a loxP  
518 site, a 3x-FLAG tag fused to EGFP was cloned into the NheI, PaeI restriction sites of the  
519 targeting vector; (4) a 2.8 kb fragment containing the second loxP site, followed by 3x-FLAG-  
520 human TFEB sequence. The final fxSTOP-FLAG-human TFEB vector was microinjected into  
521 C57BL/6J:C3H/HeJ F1 hybrid oocytes. Of six founders identified, two gave rise to fxSTOP-  
522 FLAG-human TFEB lines with comparable phenotypes. Of these lines, we chose to focus our  
523 studies principally on line 419. The presence of the floxed 3x-FLAG-eGFP STOP-3x-FLAG-  
524 human TFEB cassette is verified by allele dependent qPCR genotyping analysis with each  
525 generation (Transnetyx), and expression of the 3x-FLAG-eGFP sequence (upstream of the  
526 STOP codon) in single transgenic fxSTOP-TFEB mice is assessed every other generation. We  
527 confirmed excision of 3x-FLAG-EGFP-STOP cassette in the presence of Cre-recombinase by  
528 crossing fxSTOP-TFEB transgenic female mice with HSA-Cre transgenic mice, (JAX Strain No:  
529 006139 | HSA-Cre79), and corresponds to the HSA-Cre driver mouse line from the laboratory of  
530 Dr. Judith Melki. TdTomato mice (B6.Cg-Gt(ROSA)26Sor<sup>tm9(CAG-tdTomato)Hze/J</sup>, JAX Strain  
531 #:007909) express robust tdTomato fluorescence following Cre-mediated recombination, is  
532 congenic on the C57BL/6J genetic background and were also obtained from JAX. The MAPT  
533 P301S line (Stock No: 008169) originated in the laboratory of Dr. Virginia Lee.  
534 cTFEB;HSACre;MAPT P301S transgenic mice were generated by crossing fxSTOP-TFEB  
535 females to MAPT P301S males. Female double transgenic offspring was then crossed with  
536 homozygote HSA-Cre transgenic males. All commercially available lines were obtained directly  
537 from JAX. All lines have been maintained in a C57/B6 background for over ten generations in  
538 our lab. Age-matched littermates were used for all experiments. Mice were housed in a  
539 temperature- and humidity-controlled environment on a 12-hour light/dark cycle with food and  
540 water ad libitum. Mice of both sexes were used for all experiments in equal numbers, or as  
541 close to equal numbers as possible. All animal experimentation adhered to NIH guidelines and  
542 was approved by and performed in accordance with the University of California, San Diego,

543 Duke University and University of Alabama at Birmingham Institutional Animal Care and Use.  
544 The fxSTOp-TFEB line of transgenic mice is available for sharing with academic institutions  
545 free-of-charge. For-profit institutions will adhere to UCSD's policy regarding copyrighted  
546 material.

#### 547 **Tissue Collections**

548 Animals were anesthetized with 3.8% Avertin Solution. All animals received a transcatheter  
549 perfusion with 60 mLs of cold 1x PBS. Half of the tissue (right/left muscle, right/left hemi-brain)  
550 was post-fixed in 4% PFA for less than 24 hours before being transferred to 30% sucrose for  
551 another 24 hrs, the other half was flash-frozen in liquid nitrogen for RNA and protein analyses.

#### 552 **RT-PCR Analysis**

553 Flash frozen perfused isolated mouse tissues (Quadriceps, Hippocampus) were placed in plastic  
554 tubes with silica beads (MP Biomedical, 116913100) and homogenized in TRIzol (Invitrogen,  
555 15596026). RNA was extracted via standard phenol-chloroform procedures followed by DNase  
556 digestion (Thermo Fisher, AM2238). cDNA was generated using iScript (Bio-Rad Technologies,  
557 1708891). Quantitative PCR was run using Sybrgreen (Life Technologies, 4309155) for  
558 chemical detection (Applied Biosystems; QuantStudio 3). Enrichment was determined based on  
559 double-delta CT value. Primers were ordered from IDT Predesigned qPCR Assays unless  
560 otherwise specified. Primers used are listed in Primer Table 1.

#### 561 **ImmunoBlot Analysis**

562 Protein lysates from muscle tissue was prepared as previously described<sup>40,42</sup>. Protein  
563 concentration was quantified using a Pierce™ BCA Protein Assay (23227). Fifty µg of  
564 homogenized proteins were loaded per lane, and after running Any KD, 10%, or 4-15% Mini-  
565 PROTEAN TGX Gels (BioRad, 4568124, 4561034, and 4561084), samples were transferred to  
566 0.2 µm (for LC3) or 0.45 µm (for everything else) PVDF membranes (BioRad, 162-0175 and  
567 1704275), which were blocked in 5% BSA in PBS at RT for 1 hr. Membranes were incubated  
568 with anti-FLAG antibody (Sigma, M2, 1:1000), anti-Lamp1 antibody (Novus Bio, NB600-956,  
569 1:1000), anti-LC3 antibody (Cell Signaling, 2775S, 1:1000), anti-p62 (MBC, PM045, 1:1000),  
570 anti-cathepsin B (Cell Signaling, 31718S, 1:1000) or anti-GAPDH (Invitrogen, AM4300, 1:5000)  
571 in PBS-T with 5% BSA at 4°C overnight. The primary antibody was visualized with horseradish-  
572 peroxidase conjugated anti-rabbit at 1:5,000 (Cell Signaling, 7074P2) and enhanced

573 chemiluminescence (BioRad, 170-5060) or goat-anti-mouse IgG 680 (Invitrogen, A21058) at  
574 1:10,000. Densitometry analysis was performed using the BioRad Image Lab 6.1 software  
575 application.

### 576 **Cathepsin B ELISA Analysis**

577 Fifty  $\mu$ l of serum (collected via blood cardiac puncture and isolated via standard  
578 coagulation/centrifugation protocols) was diluted 1:1 by reconstituting with sample dilutant buffer  
579 (Abcam, ab119585). Diluted samples were processed following kit instructions, and imaged at  
580 450 nm (Tecan, Infinite M plex). Amount of cathepsin B was determined using a standard  
581 dilution curve of known concentration.

### 582 **Histological Studies**

583 Tissue was embedded in OCT (TissueTek, 4583), frozen utilizing 2-methylbutane (VWR,  
584 103525-278) submerged in liquid nitrogen and stored at -80C until used. All samples were  
585 sectioned on a standing cryostat (Leica). Sections of brain were 20 microns, while muscle tissue  
586 was 15 microns thick. For immunohistochemistry, sections were permeabilized with .25% Triton  
587 for 15 mins and blocked with 4% BSA for 30 minutes-1 hour. Brain sections were then incubated  
588 with anti-GFAP (ab4674, Abcam, 1:200), anti-Iba1 (Wako, 019-19741, 1:200), and anti-AT8  
589 TAU (Invitrogen, MN1020, 1:100) while muscle sections were incubated with anti-laminin  
590 (Sigma, L9393, 1:200), anti-FLAG (Sigma, F1804, 1:1000), anti-LC3 (Cell Signaling, 2775S,  
591 1:200), anti-ubiquitin (Abcam, ab7780 1:100) and anti-P62 (MBL, PM045, 1:200) overnight at  
592 4°C and incubated with secondary antibodies at RT for 1 hour (both diluted in 4% BSA). Next  
593 the slides were washed with Hoescht (Thermo Scientific, 62249, 1:5000) and mounted with  
594 prolong glass (Invitrogen, P36984).All slides were washed with 1X PBS three times for 5  
595 minutes each between steps.

596 Slides were imaged in the UAB HIRF HRIF Confocal/Light Microscopy Core utilizing the 10x  
597 objective on the Nikon A15R/SIM Confocal microscope. Z-stacks of the entire hippocampus  
598 area/section were collected, and max intensity projections were generated using FIJI. Lipofuscin  
599 imaging was performed using an epifluorescent Nikon light microscope with a 20x objective. For  
600 TdTomato imaging, stitched whole-section z-stacks were acquired using a Nikon A1R HD25  
601 confocal microscope of nuclei in the blue channel and native TdTomato fluorescence in the red  
602 channel.

603 For quantification of astrocyte and/or microglia parameters, raw ND2 files were uploaded to the  
604 NIS elements platform and thresholds were set to eliminate background in each channel in  
605 order to delineate each object. Morphometric information was collected in addition to the  
606 automated counting of objects. A size exclusion parameter was used for GFAP positive objects  
607 under 10 microns, IBA-1 positive objects under 15 microns, and any object larger than 5,000  
608 microns were all excluded due to standard assessments of cell sizes.

## 609 **Quantitative proteomics sample preparation and data-independent acquisition mass** 610 **spectrometry.**

611 We identified distinct protein species from crude total extractions of whole quadriceps muscle by  
612 mass spectrometry after trypsin digestion, in collaboration with the University of Washington  
613 Nathan Shock Center Protein Phenotypes of Aging Proteomics Core. Quadriceps muscle  
614 powder samples were processed and digested using S-Trap Micro Spin Column (Protifi, C02-  
615 micro-80) following the manufacturer's protocol. SDS (5%) lysis and solubilization buffer were  
616 added to liver powder samples and homogenized on ice using a sonicator probe. Protein  
617 concentrations were determined using Pierce BCA Protein Assay Kit (Thermo Fisher Scientific,  
618 PI23227). Proteins were digested at 1 ug trypsin to 25 ug protein ratio on S-Trap at 47°C for 1 h.  
619 Peptides extracted from S-Trap were dried with a vacuum concentrator and reconstituted in  
620 0.1% formic acid in water prior to mass spectrometry acquisition. Data were acquired using  
621 data-independent acquisition (DIA) on a Thermo EASY-nLC 1000 and a Thermo Q-Exactive HF  
622 orbitrap mass spectrometer. Peptides were separated using PicoFrit Self-Packed Columns (360  
623 µm OD x 75 µm ID; New Objective, Woburn, MA) packed to 30 cm with 3 µm ReproSil-Pur C18  
624 beads (ESI Source Solutions, r13.aq.0001). The trap column was packed to 2 cm with same  
625 C18 beads using 360 µm OD x 150 µm ID fused silica capillary fritted with Kasil on one end.  
626 Solvent A was 0.1% formic acid in water, and solvent B was 0.1% formic acid in 80%  
627 acetonitrile. For each injection, 1 µg of sample was loaded and eluted using a 90-min gradient  
628 from 5% to 45% B at 250 nL/min. DIA methods followed the chromatogram library workflow as  
629 described in detail previously<sup>96</sup>. All muscle samples were pooled in equal ratio to create a  
630 muscle library sample. The library samples were used to generate chromatogram libraries using  
631 the strategy described before<sup>97</sup>. Thermo Q Exactive HF MS was used to acquire six gas phase  
632 fractionated runs spanning a total mass range of 400 to 1000 m/z, each with staggered 4 m/z  
633 narrow precursor isolation windows<sup>98</sup>. EncyclopeDIA software suite was used to generate a  
634 chromatogram library<sup>96</sup> and retention time models for all peptides detected at 1% FDR  
635 determined by Percolator<sup>99</sup>. For quantitative DIA run, equal amounts of protein were used for

636 each sample. A 24 × 24 m/z staggered window from 400.43190 to 1000.7048 m/z was used as  
637 described previously<sup>98</sup>. EncyclopeDIA software suite was used to search the chromatogram  
638 library with calibrated retention time and quantify peptides and proteins in each sample.

### 639 *Proteomics Analysis*

640 A linear model was fit to the protein level data using the Bioconductor limma package<sup>100</sup>, and  
641 the estimated SVs were adjusted as covariates in our model. The limma package uses empirical  
642 Bayes moderated statistics, which improves power by 'borrowing strength' between proteins in  
643 order to moderate the residual variance<sup>101</sup>. Adjusted P value was calculated with Benjamini-  
644 Hochberg method across groups (young transgenic, young control, old transgenic, and old  
645 control). Proteins were sorted for significant differential expression with dplyr using a cutoff of  
646 less than 5% FDR and greater than  $|\pm 0.58496| \log_2$  foldchange in young and old cohorts as a  
647 change due to skeletal muscle overexpression of humanized TFEB. Volcano plots were created  
648 with ggplot and ggrepel. Significantly upregulated proteins in cTFEB;HSA-Cre mice were  
649 queried using the KEGG pathway analyzer, which is a feature of STRING's web tool<sup>54</sup>. Bar  
650 graphs were created in Rstudio with the ggplot2 and forcats packages.

651 Significantly upregulated proteins, up to two degrees from TFEB, were entered into STRINGdb  
652 for functional network analysis. A confidence interaction score of 0.70 and MCL clustering was  
653 applied to the networks. The networks were exported from STRING and imported into  
654 Cytoscape for further style editing<sup>102</sup>. Predicted secreted proteins were identified by comparing  
655 the significantly differentially expressed proteins to the mus musculus secretome from  
656 VerSeDa<sup>61</sup>.

### 657 **Gene Expression Analysis.**

#### 658 *RNA Sequencing*

659 RNA was extracted as mentioned above from flash frozen hippocampal tissue or tissue was  
660 extracted by Novogene (Novogene Corporation INC, Sacramento, CA, United States) for four  
661 biological replicates (sex/genotype) and checked for quality. mRNA libraries were prepared by  
662 Novogene and bulk RNA-seq analysis was performed via NovaSeq PE150 (Illumina, San Diego,  
663 CA, United States) high throughput sequencing.

#### 664 *Nanostring nCounter AD panel*

665 Assays were performed with 100 ng aliquots of RNA using the NanoString nCounter Analysis  
666 system (NanoString Technologies, Seattle, WA, USA) at the UAB Nanostring Core, following  
667 previously described and established protocols<sup>73</sup>. Counts for target genes were normalized to  
668 house-keeping genes included in the panel (*Cltc*, *Gapdh*, *Gusb*, *Hprt*, *Pgk1*, *Tubb5*). After  
669 codeset hybridization overnight, the samples were washed and immobilized to a cartridge using  
670 the NanoString nCounter Prep Station. Cartridges were scanned in the nCounter Digital  
671 Analyzer at 555 fields of view for the maximum level of sensitivity. Gene expression was  
672 normalized using NanoStringNorm R package. Specifically, background correction was  
673 performed using the negative control at the cutoff of mean + 2 standard deviation. All p values  
674 were adjusted using a false discovery rate (FDR) correction of 1% for multiple comparisons.  
675 Housekeeping genes were used to for normalization based on geometric mean. Data and heat  
676 analyses were performed in the nSolver Analysis Software 2.0. Gene expression values were  
677 presented as the percentage of the MAPT P301S group for comparison of MAPT P301S  
678 pathogenesis to the cTFEB;HSACre;MAPT P301S cohort.

## 679 **Mouse Phenotyping and Behavioral Studies.**

### 680 *Barnes Maze*

681 The Barnes maze apparatus is an opaque Plexiglas disc 75 cm in diameter elevated 58 cm  
682 above the floor by a tripod. Twenty holes, 5 cm in diameter, are located 5 cm from the  
683 perimeter, and a black Plexiglas escape box (19 x 8 x 7 cm) is placed under one of the holes.  
684 Distinct spatial cues are located all around the maze and are kept constant throughout the  
685 study. On the first day of testing, a training session was performed, which consists of placing the  
686 mouse in the escape box for one minute. After the one minute habituation period, the first  
687 session was started. At the beginning of each session, the mouse was placed in the middle of  
688 the maze in a 10 cm high cylindrical black start chamber. After 10 seconds the start chamber  
689 was removed, a buzzer (80 dB) and a light (400 lux) were turned on, and the mouse was set  
690 free to explore the maze. The session ended when the mouse entered the escape tunnel or  
691 after 3 min elapsed. When the mouse entered the escape tunnel, the buzzer was turned off and  
692 the mouse was allowed to remain in the dark for one minute. When the mouse did not enter the  
693 tunnel by itself it was gently put in the escape box for one minute. The tunnel was always  
694 located underneath the same hole (stable within the spatial environment), which was randomly  
695 determined for each mouse. Mice were tested once a day for 4 days for the acquisition portion  
696 of the study. For the 5th test (probe test), the escape tunnel was removed and the mouse was



697 allowed to freely explore the maze for 3 min. The time spent in each quadrant was determined  
698 and the percent time spent in the target quadrant (the one originally containing the escape box)  
699 was compared with the average percent time in the other three quadrants. This was a direct test  
700 of spatial memory as there was no potential for local cues to be used in the mouse's behavioral  
701 decision. Two weeks later the mice were tested again with the escape box in the original  
702 position (retention test). This allows for the examination of long term memory. Finally, on the  
703 day after this test, the escape tunnel was moved to a new location (90 degrees from the original  
704 position) and the behavior of the mouse was recorded. This is called the reversal test and it  
705 allows for the examination of perseveration at the old hole as well as the working memory  
706 strategies the mice adopted to locate the new tunnel location. Each session was videotaped and  
707 scored by an experimenter blind to the genotype of the mouse. Measures recorded include the  
708 latency to enter the escape box and the number of errors made per session. Errors are defined  
709 as nose pokes and head deflections over any hole that did not have the tunnel beneath it. The  
710 probe data were analyzed using Noldus Ethovision software to determine time spent in each  
711 quadrant of the maze as well as to assess activity measures.

#### 712 *Novel Object Recognition*

713 Mice were individually habituated to a 51cm x 51cm x 39cm open field for 5 min. Mice were then  
714 tested with two identical objects placed in the field (either two 250 ml amber bottles or two clear  
715 plastic cylinders 6x6x16cm half filled with glass marbles). An individual animal was allowed to  
716 explore for 5 min, now with the objects present. After two such trials (each separated by 1  
717 minute in a holding cage), the mouse was tested in the object novelty recognition test in which a  
718 novel object replaced one of the familiar objects (for example, an amber bottle if the cylinders  
719 were initially used). All objects and the arena were thoroughly cleaned with 70% ethanol  
720 between trials to remove odors. Behavior was video recorded and then scored for number  
721 contacts (touching with nose or nose pointing at object and within 0.5 cm of object) and/or for  
722 time contacting the objects. Habituation to the objects across the familiarization trials  
723 (decreased contacts) was an initial measure of learning and then renewed interest (increased  
724 contacts) in the new object indicated successful object memory. Recognition indexes were  
725 calculated using the following formula:  $\frac{\# \text{ contacts during test}}{\# \text{ contacts in last familiarization trial} + \# \text{ contacts during test}}$ . Values greater than 0.5 indicate increased interest, whereas  
726 values less than 0.5 indicate decreased interest in the object during the test relative to the final  
727 familiarization trial.  
728

729 **Statistical Analysis**

730 All data were analyzed by t-test, 1-way, 2-way or 3-way between-subject ANOVA with post hoc  
731 comparisons depending on the number of variables and groups in each analysis. For ANOVA, if  
732 statistical significance ( $p < 0.05$ ) was achieved, we performed post hoc analysis to account for  
733 multiple comparisons. The level of significance ( $\alpha$ ) was always set at 0.05. Survival curves were  
734 analyzed using Log-rank (Mantel-Cox) Test. Data were analyzed using Prism 7 (GraphPad  
735 Software, La Jolla, CA) and are represented as means and standard error of the means. All  
736 experiments and data analyses were conducted in a blinded fashion. All data were prepared for  
737 analysis with standard spread sheet software (Microsoft Excel).

738

739

740

741

742

743

744

745

746

747

748

749

750

751

## 752 REFERENCES

- 753 1 Lopez-Otin, C., Blasco, M. A., Partridge, L., Serrano, M. & Kroemer, G. The hallmarks of aging.  
754 *Cell* **153**, 1194-1217, doi:10.1016/j.cell.2013.05.039 (2013).
- 755 2 Mattson, M. P. & Arumugam, T. V. Hallmarks of Brain Aging: Adaptive and Pathological  
756 Modification by Metabolic States. *Cell metabolism* **27**, 1176-1199,  
757 doi:10.1016/j.cmet.2018.05.011 (2018).
- 758 3 Ham, S. & Lee, S. V. Advances in transcriptome analysis of human brain aging. *Exp Mol Med* **52**,  
759 1787-1797, doi:10.1038/s12276-020-00522-6 (2020).
- 760 4 Aman, Y. *et al.* Autophagy in healthy aging and disease. *Nat Aging* **1**, 634-650,  
761 doi:10.1038/s43587-021-00098-4 (2021).
- 762 5 Hara, T. *et al.* Suppression of basal autophagy in neural cells causes neurodegenerative disease  
763 in mice. *Nature* **441**, 885-889, doi:10.1038/nature04724 (2006).
- 764 6 Komatsu, M. *et al.* Loss of autophagy in the central nervous system causes neurodegeneration in  
765 mice. *Nature* **441**, 880-884, doi:10.1038/nature04723 (2006).
- 766 7 Mansueto, G. *et al.* Transcription Factor EB Controls Metabolic Flexibility during Exercise. *Cell*  
767 *metabolism* **25**, 182-196, doi:10.1016/j.cmet.2016.11.003 (2017).
- 768 8 Kim, K. H. *et al.* Autophagy deficiency leads to protection from obesity and insulin resistance by  
769 inducing Fgf21 as a mitokine. *Nat Med* **19**, 83-92, doi:10.1038/nm.3014 (2013).
- 770 9 Kustermann, M. *et al.* Loss of the novel Vcp (valosin containing protein) interactor Washc4  
771 interferes with autophagy-mediated proteostasis in striated muscle and leads to myopathy in  
772 vivo. *Autophagy* **14**, 1911-1927, doi:10.1080/15548627.2018.1491491 (2018).
- 773 10 Lapierre, L. R. *et al.* The TFEB orthologue HLH-30 regulates autophagy and modulates longevity  
774 in *Caenorhabditis elegans*. *Nat Commun* **4**, 2267, doi:10.1038/ncomms3267 (2013).
- 775 11 Pyo, J. O. *et al.* Overexpression of Atg5 in mice activates autophagy and extends lifespan. *Nat*  
776 *Commun* **4**, 2300, doi:10.1038/ncomms3300 (2013).
- 777 12 Simonsen, A. *et al.* Promoting basal levels of autophagy in the nervous system enhances  
778 longevity and oxidant resistance in adult *Drosophila*. *Autophagy* **4**, 176-184, doi:5269 [pii]  
779 (2008).
- 780 13 Colman, R. J. *et al.* Caloric restriction delays disease onset and mortality in rhesus monkeys.  
781 *Science* **325**, 201-204, doi:10.1126/science.1173635 (2009).
- 782 14 Eisenberg, T. *et al.* Induction of autophagy by spermidine promotes longevity. *Nature cell*  
783 *biology* **11**, 1305-1314, doi:10.1038/ncb1975 (2009).
- 784 15 Harrison, D. E. *et al.* Rapamycin fed late in life extends lifespan in genetically heterogeneous  
785 mice. *Nature* **460**, 392-395, doi:10.1038/nature08221 (2009).
- 786 16 Settembre, C. *et al.* TFEB controls cellular lipid metabolism through a starvation-induced  
787 autoregulatory loop. *Nature cell biology* **15**, 647-658, doi:10.1038/ncb2718 (2013).
- 788 17 Demontis, F., Patel, V. K., Swindell, W. R. & Perrimon, N. Intertissue control of the nucleolus via  
789 a myokine-dependent longevity pathway. *Cell Rep* **7**, 1481-1494,  
790 doi:10.1016/j.celrep.2014.05.001 (2014).
- 791 18 Rai, M. *et al.* Proteasome stress in skeletal muscle mounts a long-range protective response that  
792 delays retinal and brain aging. *Cell metabolism* **33**, 1137-1154 e1139,  
793 doi:10.1016/j.cmet.2021.03.005 (2021).
- 794 19 Durieux, J., Wolff, S. & Dillin, A. The cell-non-autonomous nature of electron transport chain-  
795 mediated longevity. *Cell* **144**, 79-91, doi:10.1016/j.cell.2010.12.016 (2011).
- 796 20 Taylor, R. C. & Dillin, A. XBP-1 is a cell-nonautonomous regulator of stress resistance and  
797 longevity. *Cell* **153**, 1435-1447, doi:10.1016/j.cell.2013.05.042 (2013).

- 798 21 Demontis, F. & Perrimon, N. FOXO/4E-BP signaling in *Drosophila* muscles regulates organism-  
799 wide proteostasis during aging. *Cell* **143**, 813-825, doi:10.1016/j.cell.2010.10.007 (2010).
- 800 22 van Oosten-Hawle, P., Porter, R. S. & Morimoto, R. I. Regulation of organismal proteostasis by  
801 transcellular chaperone signaling. *Cell* **153**, 1366-1378, doi:10.1016/j.cell.2013.05.015 (2013).
- 802 23 Villeda, S. A. *et al.* The ageing systemic milieu negatively regulates neurogenesis and cognitive  
803 function. *Nature* **477**, 90-94, doi:10.1038/nature10357 (2011).
- 804 24 Conboy, I. M. *et al.* Rejuvenation of aged progenitor cells by exposure to a young systemic  
805 environment. *Nature* **433**, 760-764, doi:10.1038/nature03260 (2005).
- 806 25 Castellano, J. M. *et al.* Human umbilical cord plasma proteins revitalize hippocampal function in  
807 aged mice. *Nature* **544**, 488-492, doi:10.1038/nature22067 (2017).
- 808 26 Schaum, N. *et al.* Ageing hallmarks exhibit organ-specific temporal signatures. *Nature* **583**, 596-  
809 602, doi:10.1038/s41586-020-2499-y (2020).
- 810 27 Villeda, S. A. *et al.* Young blood reverses age-related impairments in cognitive function and  
811 synaptic plasticity in mice. *Nat Med* **20**, 659-663, doi:10.1038/nm.3569 (2014).
- 812 28 De Miguel, Z. *et al.* Exercise plasma boosts memory and dampens brain inflammation via  
813 clusterin. *Nature*, doi:10.1038/s41586-021-04183-x (2021).
- 814 29 Horowitz, A. M. *et al.* Blood factors transfer beneficial effects of exercise on neurogenesis and  
815 cognition to the aged brain. *Science* **369**, 167-173, doi:10.1126/science.aaw2622 (2020).
- 816 30 Ozek, C., Krolewski, R. C., Buchanan, S. M. & Rubin, L. L. Growth Differentiation Factor 11  
817 treatment leads to neuronal and vascular improvements in the hippocampus of aged mice. *Sci*  
818 *Rep* **8**, 17293, doi:10.1038/s41598-018-35716-6 (2018).
- 819 31 Wrann, C. D. *et al.* Exercise induces hippocampal BDNF through a PGC-1 $\alpha$ /FNDC5 pathway. *Cell*  
820 *metabolism* **18**, 649-659, doi:10.1016/j.cmet.2013.09.008 (2013).
- 821 32 Islam, M. R. *et al.* Exercise hormone irisin is a critical regulator of cognitive function. *Nat Metab*  
822 **3**, 1058-1070, doi:10.1038/s42255-021-00438-z (2021).
- 823 33 Moon, H. Y. *et al.* Running-Induced Systemic Cathepsin B Secretion Is Associated with Memory  
824 Function. *Cell metabolism* **24**, 332-340, doi:10.1016/j.cmet.2016.05.025 (2016).
- 825 34 White, P. J. *et al.* Protectin DX alleviates insulin resistance by activating a myokine-liver  
826 glucoregulatory axis. *Nat Med* **20**, 664-669, doi:10.1038/nm.3549 (2014).
- 827 35 Quinn, L. S., Anderson, B. G., Strait-Bodey, L., Stroud, A. M. & Argilés, J. M. Oversecretion of  
828 interleukin-15 from skeletal muscle reduces adiposity. *American Journal of Physiology-*  
829 *Endocrinology and Metabolism* **296**, E191-E202 (2009).
- 830 36 Boyle, P. A., Buchman, A. S., Wilson, R. S., Leurgans, S. E. & Bennett, D. A. Association of muscle  
831 strength with the risk of Alzheimer disease and the rate of cognitive decline in community-  
832 dwelling older persons. *Arch Neurol* **66**, 1339-1344, doi:10.1001/archneurol.2009.240 (2009).
- 833 37 Kim, J. *et al.* Association of muscle and visceral adipose tissues with the probability of  
834 Alzheimer's disease in healthy subjects. *Sci Rep* **9**, 949, doi:10.1038/s41598-018-37244-9 (2019).
- 835 38 Lourenco, M. V. *et al.* Exercise-linked FNDC5/irisin rescues synaptic plasticity and memory  
836 defects in Alzheimer's models. *Nat Med* **25**, 165-175, doi:10.1038/s41591-018-0275-4 (2019).
- 837 39 Gupta, R., Khan, R. & Cortes, C. J. Forgot to Exercise? Exercise Derived Circulating Myokines in  
838 Alzheimer's Disease: A Perspective. *Front Neurol* **12**, 649452, doi:10.3389/fneur.2021.649452  
839 (2021).
- 840 40 Cortes, C. J. *et al.* Polyglutamine-expanded androgen receptor interferes with TFEB to elicit  
841 autophagy defects in SBMA. *Nat Neurosci* **17**, 1180-1189, doi:10.1038/nn.3787 (2014).
- 842 41 Cortes, C. J. & La Spada, A. R. Motor neuron degeneration in spinal and Bulbar Muscular Atrophy  
843 is a skeletal muscle-driven process: Relevance to therapy development and implications for  
844 related motor neuron diseases. *Rare Dis* **2**, e962402, doi:10.4161/2167549X.2014.962402  
845 (2014).

- 846 42 Cortes, C. J. *et al.* Muscle expression of mutant androgen receptor accounts for systemic and  
847 motor neuron disease phenotypes in spinal and bulbar muscular atrophy. *Neuron* **82**, 295-307,  
848 doi:10.1016/j.neuron.2014.03.001 (2014).
- 849 43 Settembre, C. *et al.* TFEB links autophagy to lysosomal biogenesis. *Science* **332**, 1429-1433,  
850 doi:10.1126/science.1204592 (2011).
- 851 44 Palmieri, M. *et al.* Characterization of the CLEAR network reveals an integrated control of  
852 cellular clearance pathways. *Human molecular genetics* **20**, 3852-3866,  
853 doi:10.1093/hmg/ddr306 (2011).
- 854 45 Sardiello, M. *et al.* A gene network regulating lysosomal biogenesis and function. *Science* **325**,  
855 473-477, doi:10.1126/science.1174447 (2009).
- 856 46 Morgan, T. E. *et al.* The mosaic of brain glial hyperactivity during normal ageing and its  
857 attenuation by food restriction. *Neuroscience* **89**, 687-699, doi:10.1016/s0306-4522(98)00334-0  
858 (1999).
- 859 47 van Praag, H., Shubert, T., Zhao, C. & Gage, F. H. Exercise enhances learning and hippocampal  
860 neurogenesis in aged mice. *The Journal of neuroscience : the official journal of the Society for*  
861 *Neuroscience* **25**, 8680-8685, doi:10.1523/jneurosci.1731-05.2005 (2005).
- 862 48 Zhu, H., Guo, Q. & Mattson, M. P. Dietary restriction protects hippocampal neurons against the  
863 death-promoting action of a presenilin-1 mutation. *Brain Res* **842**, 224-229, doi:10.1016/s0006-  
864 8993(99)01827-2 (1999).
- 865 49 Duan, W. & Mattson, M. P. Dietary restriction and 2-deoxyglucose administration improve  
866 behavioral outcome and reduce degeneration of dopaminergic neurons in models of Parkinson's  
867 disease. *J Neurosci Res* **57**, 195-206, doi:10.1002/(SICI)1097-4547(19990715)57:2<195::AID-  
868 JNR5>3.0.CO;2-P (1999).
- 869 50 Choi, S. H. *et al.* Combined adult neurogenesis and BDNF mimic exercise effects on cognition in  
870 an Alzheimer's mouse model. *Science* **361**, doi:10.1126/science.aan8821 (2018).
- 871 51 Leu, M. *et al.* Erbb2 regulates neuromuscular synapse formation and is essential for muscle  
872 spindle development. *Development* **130**, 2291-2301 (2003).
- 873 52 Madisen, L. *et al.* A robust and high-throughput Cre reporting and characterization system for  
874 the whole mouse brain. *Nat Neurosci* **13**, 133-140, doi:10.1038/nn.2467 (2010).
- 875 53 Giacomello, E. *et al.* Age Dependent Modification of the Metabolic Profile of the Tibialis Anterior  
876 Muscle Fibers in C57BL/6J Mice. *Int J Mol Sci* **21**, doi:10.3390/ijms21113923 (2020).
- 877 54 Szklarczyk, D. *et al.* The STRING database in 2021: customizable protein-protein networks, and  
878 functional characterization of user-uploaded gene/measurement sets. *Nucleic Acids Res* **49**,  
879 D605-D612, doi:10.1093/nar/gkaa1074 (2021).
- 880 55 Decressac, M. *et al.* TFEB-mediated autophagy rescues midbrain dopamine neurons from alpha-  
881 synuclein toxicity. *Proceedings of the National Academy of Sciences of the United States of*  
882 *America* **110**, E1817-1826, doi:10.1073/pnas.1305623110 (2013).
- 883 56 Spampinato, C. *et al.* Transcription factor EB (TFEB) is a new therapeutic target for Pompe  
884 disease. *EMBO Mol Med* **5**, 691-706, doi:10.1002/emmm.201202176 (2013).
- 885 57 Klionsky, D. J. *et al.* Guidelines for the use and interpretation of assays for monitoring autophagy  
886 (3rd edition). *Autophagy* **12**, 1-222, doi:10.1080/15548627.2015.1100356 (2016).
- 887 58 Jiao, J. & Demontis, F. Skeletal muscle autophagy and its role in sarcopenia and organismal  
888 aging. *Curr Opin Pharmacol* **34**, 1-6, doi:10.1016/j.coph.2017.03.009 (2017).
- 889 59 Mancinelli, R. *et al.* Biological Aspects of Selected Myokines in Skeletal Muscle: Focus on Aging.  
890 *Int J Mol Sci* **22**, doi:10.3390/ijms22168520 (2021).
- 891 60 Rai, M. & Demontis, F. Systemic Nutrient and Stress Signaling via Myokines and Myometabolites.  
892 *Annu Rev Physiol* **78**, 85-107, doi:10.1146/annurev-physiol-021115-105305 (2016).

- 893 61 Cortazar, A. R., Oguiza, J. A., Aransay, A. M. & Lavin, J. L. VerSeDa: vertebrate secretome  
894 database. *Database (Oxford)* **2017**, doi:10.1093/database/baw171 (2017).
- 895 62 Lehallier, B. *et al.* Undulating changes in human plasma proteome profiles across the lifespan.  
896 *Nature Medicine* **25**, 1843-1850, doi:10.1038/s41591-019-0673-2 (2019).
- 897 63 Joly-Amado, A. *et al.* CCL2 Overexpression in the Brain Promotes Glial Activation and Accelerates  
898 Tau Pathology in a Mouse Model of Tauopathy. *Front Immunol* **11**, 997,  
899 doi:10.3389/fimmu.2020.00997 (2020).
- 900 64 Frakes, A. E. *et al.* Microglia induce motor neuron death via the classical NF-kappaB pathway in  
901 amyotrophic lateral sclerosis. *Neuron* **81**, 1009-1023, doi:10.1016/j.neuron.2014.01.013 (2014).
- 902 65 Islam, O., Gong, X., Rose-John, S. & Heese, K. Interleukin-6 and neural stem cells: more than  
903 gliogenesis. *Mol Biol Cell* **20**, 188-199, doi:10.1091/mbc.E08-05-0463 (2009).
- 904 66 Leibinger, M. *et al.* Interleukin-6 contributes to CNS axon regeneration upon inflammatory  
905 stimulation. *Cell Death Dis* **4**, e609, doi:10.1038/cddis.2013.126 (2013).
- 906 67 Yoshiyama, Y. *et al.* Synapse loss and microglial activation precede tangles in a P301S tauopathy  
907 mouse model. *Neuron* **53**, 337-351, doi:10.1016/j.neuron.2007.01.010 (2007).
- 908 68 Moloney, C. M., Lowe, V. J. & Murray, M. E. Visualization of neurofibrillary tangle maturity in  
909 Alzheimer's disease: A clinicopathologic perspective for biomarker research. *Alzheimers Dement*  
910 **17**, 1554-1574, doi:10.1002/alz.12321 (2021).
- 911 69 Jurga, A. M., Paleczna, M. & Kuter, K. Z. Overview of General and Discriminating Markers of  
912 Differential Microglia Phenotypes. *Front Cell Neurosci* **14**, 198, doi:10.3389/fncel.2020.00198  
913 (2020).
- 914 70 Rozovsky, I., Finch, C. E. & Morgan, T. E. Age-related activation of microglia and astrocytes: in  
915 vitro studies show persistent phenotypes of aging, increased proliferation, and resistance to  
916 down-regulation. *Neurobiol Aging* **19**, 97-103, doi:10.1016/s0197-4580(97)00169-3 (1998).
- 917 71 Godbout, J. P. *et al.* Exaggerated neuroinflammation and sickness behavior in aged mice  
918 following activation of the peripheral innate immune system. *FASEB J* **19**, 1329-1331,  
919 doi:10.1096/fj.05-3776fje (2005).
- 920 72 Sidoryk-Wegrzynowicz, M. *et al.* Astrocytes in mouse models of tauopathies acquire early  
921 deficits and lose neurosupportive functions. *Acta Neuropathol Commun* **5**, 89,  
922 doi:10.1186/s40478-017-0478-9 (2017).
- 923 73 Preuss, C. *et al.* A novel systems biology approach to evaluate mouse models of late-onset  
924 Alzheimer's disease. *Mol Neurodegener* **15**, 67, doi:10.1186/s13024-020-00412-5 (2020).
- 925 74 de Rojas, I. *et al.* Common variants in Alzheimer's disease and risk stratification by polygenic risk  
926 scores. *Nat Commun* **12**, 3417, doi:10.1038/s41467-021-22491-8 (2021).
- 927 75 Scelsi, M. A. *et al.* Genetic study of multimodal imaging Alzheimer's disease progression score  
928 implicates novel loci. *Brain* **141**, 2167-2180, doi:10.1093/brain/awy141 (2018).
- 929 76 Kim, B. H., Nho, K., Lee, J. M. & Alzheimer's Disease Neuroimaging, I. Genome-wide association  
930 study identifies susceptibility loci of brain atrophy to NFIA and ST18 in Alzheimer's disease.  
931 *Neurobiol Aging* **102**, 200 e201-200 e211, doi:10.1016/j.neurobiolaging.2021.01.021 (2021).
- 932 77 Li, G. *et al.* Association of GALC, ZNF184, IL1R2 and ELOVL7 With Parkinson's Disease in Southern  
933 Chinese. *Front Aging Neurosci* **10**, 402, doi:10.3389/fnagi.2018.00402 (2018).
- 934 78 Sherva, R. *et al.* Genome-wide association study of the rate of cognitive decline in Alzheimer's  
935 disease. *Alzheimers Dement* **10**, 45-52, doi:10.1016/j.jalz.2013.01.008 (2014).
- 936 79 Chai K, L. J., Zhang X, Gu H, Cao P, Ye W, Tang H, Liu J, Chen S, Wan F, Liu GL, Shen D. ARHGDI  
937 Plays a Novel Role in the Braak Stages of Alzheimer's Diseases via the Immune Response  
938 Mediated by Microglia
- 939 *Pre-print: Research Square*, doi:10.21203/rs.3.rs-474315/v1 (2021).

- 940 80 Simon, M. J. *et al.* Transcriptional network analysis of human astrocytic endfoot genes reveals  
941 region-specific associations with dementia status and tau pathology. *Sci Rep* **8**, 12389,  
942 doi:10.1038/s41598-018-30779-x (2018).
- 943 81 Knopman, D. S. *et al.* Alzheimer disease. *Nat Rev Dis Primers* **7**, 33, doi:10.1038/s41572-021-  
944 00269-y (2021).
- 945 82 Wohlgemuth, S. E., Seo, A. Y., Marzetti, E., Lees, H. A. & Leeuwenburgh, C. Skeletal muscle  
946 autophagy and apoptosis during aging: effects of calorie restriction and life-long exercise. *Exp*  
947 *Gerontol* **45**, 138-148, doi:10.1016/j.exger.2009.11.002 (2010).
- 948 83 Grumati, P. *et al.* Autophagy is defective in collagen VI muscular dystrophies, and its reactivation  
949 rescues myofiber degeneration. *Nat Med* **16**, 1313-1320, doi:10.1038/nm.2247 (2010).
- 950 84 He, C., Sumpter, R., Jr. & Levine, B. Exercise induces autophagy in peripheral tissues and in the  
951 brain. *Autophagy* **8**, 1548-1551, doi:10.4161/auto.21327 (2012).
- 952 85 Masiero, E. *et al.* Autophagy is required to maintain muscle mass. *Cell metabolism* **10**, 507-515,  
953 doi:10.1016/j.cmet.2009.10.008 (2009).
- 954 86 Raben, N. *et al.* Suppression of autophagy in skeletal muscle uncovers the accumulation of  
955 ubiquitinated proteins and their potential role in muscle damage in Pompe disease. *Human*  
956 *molecular genetics* **17**, 3897-3908, doi:10.1093/hmg/ddn292 (2008).
- 957 87 Vainshtein, A., Grumati, P., Sandri, M. & Bonaldo, P. Skeletal muscle, autophagy, and physical  
958 activity: the menage a trois of metabolic regulation in health and disease. *J Mol Med (Berl)* **92**,  
959 127-137, doi:10.1007/s00109-013-1096-z (2014).
- 960 88 Bostrom, P. *et al.* A PGC1-alpha-dependent myokine that drives brown-fat-like development of  
961 white fat and thermogenesis. *Nature* **481**, 463-468, doi:10.1038/nature10777 (2012).
- 962 89 Otaka, N. *et al.* Myonectin Is an Exercise-Induced Myokine That Protects the Heart From  
963 Ischemia-Reperfusion Injury. *Circ Res* **123**, 1326-1338, doi:10.1161/CIRCRESAHA.118.313777  
964 (2018).
- 965 90 Ximerakis, M. *et al.* Single-cell transcriptomic profiling of the aging mouse brain. *Nat Neurosci*  
966 **22**, 1696-1708, doi:10.1038/s41593-019-0491-3 (2019).
- 967 91 Vizovisek, M., Fonovic, M. & Turk, B. Cysteine cathepsins in extracellular matrix remodeling:  
968 Extracellular matrix degradation and beyond. *Matrix Biol* **75-76**, 141-159,  
969 doi:10.1016/j.matbio.2018.01.024 (2019).
- 970 92 Tran, A. P., Sundar, S., Yu, M., Lang, B. T. & Silver, J. Modulation of Receptor Protein Tyrosine  
971 Phosphatase Sigma Increases Chondroitin Sulfate Proteoglycan Degradation through Cathepsin  
972 B Secretion to Enhance Axon Outgrowth. *The Journal of neuroscience : the official journal of the*  
973 *Society for Neuroscience* **38**, 5399-5414, doi:10.1523/JNEUROSCI.3214-17.2018 (2018).
- 974 93 Saini, M. G. & Bix, G. J. Oxygen-glucose deprivation (OGD) and interleukin-1 (IL-1) differentially  
975 modulate cathepsin B/L mediated generation of neuroprotective perlecan LG3 by neurons. *Brain*  
976 *Res* **1438**, 65-74, doi:10.1016/j.brainres.2011.12.027 (2012).
- 977 94 Muigg, P. *et al.* Differential stress-induced neuronal activation patterns in mouse lines  
978 selectively bred for high, normal or low anxiety. *PLoS one* **4**, e5346,  
979 doi:10.1371/journal.pone.0005346 (2009).
- 980 95 Czibere, L. *et al.* Profiling trait anxiety: transcriptome analysis reveals cathepsin B (Ctsb) as a  
981 novel candidate gene for emotionality in mice. *PLoS one* **6**, e23604,  
982 doi:10.1371/journal.pone.0023604 (2011).
- 983 96 Searle, B. C. *et al.* Chromatogram libraries improve peptide detection and quantification by data  
984 independent acquisition mass spectrometry. *Nat Commun* **9**, 5128, doi:10.1038/s41467-018-  
985 07454-w (2018).

986 97 Pino, L. K., Just, S. C., MacCoss, M. J. & Searle, B. C. Acquiring and Analyzing Data Independent  
987 Acquisition Proteomics Experiments without Spectrum Libraries. *Mol Cell Proteomics* **19**, 1088-  
988 1103, doi:10.1074/mcp.P119.001913 (2020).  
989 98 Amodei, D. *et al.* Improving Precursor Selectivity in Data-Independent Acquisition Using  
990 Overlapping Windows. *J Am Soc Mass Spectrom* **30**, 669-684, doi:10.1007/s13361-018-2122-8  
991 (2019).  
992 99 Kall, L., Canterbury, J. D., Weston, J., Noble, W. S. & MacCoss, M. J. Semi-supervised learning for  
993 peptide identification from shotgun proteomics datasets. *Nat Methods* **4**, 923-925,  
994 doi:10.1038/nmeth1113 (2007).  
995 100 Ritchie, M. E. *et al.* limma powers differential expression analyses for RNA-sequencing and  
996 microarray studies. *Nucleic Acids Res* **43**, e47, doi:10.1093/nar/gkv007 (2015).  
997 101 Smyth, G. K. Linear models and empirical bayes methods for assessing differential expression in  
998 microarray experiments. *Stat Appl Genet Mol Biol* **3**, Article3, doi:10.2202/1544-6115.1027  
999 (2004).  
1000 102 Shannon, P. *et al.* Cytoscape: a software environment for integrated models of biomolecular  
1001 interaction networks. *Genome Res* **13**, 2498-2504, doi:10.1101/gr.1239303 (2003).  
1002



Figure 1

a.

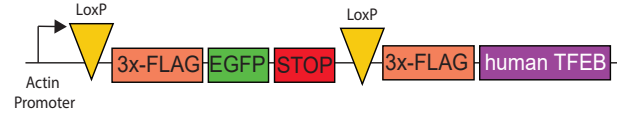

b.

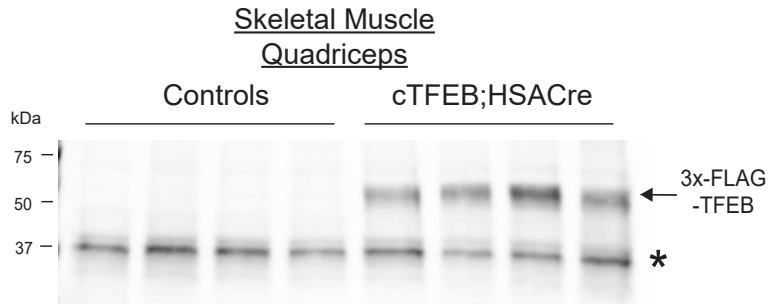

e.

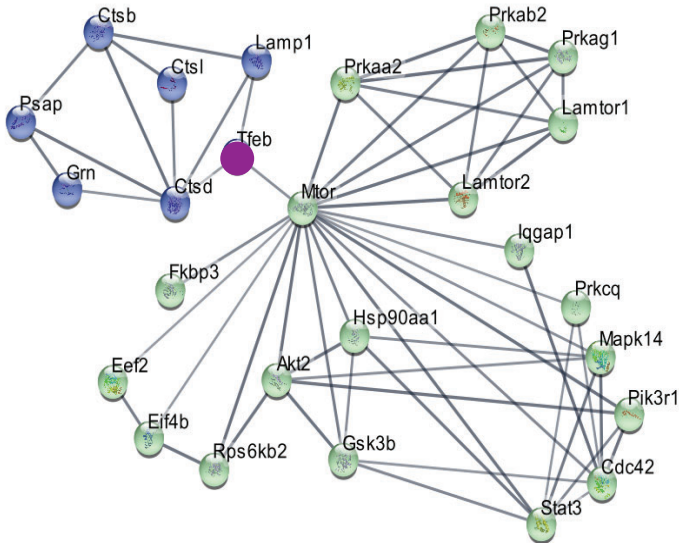

c.

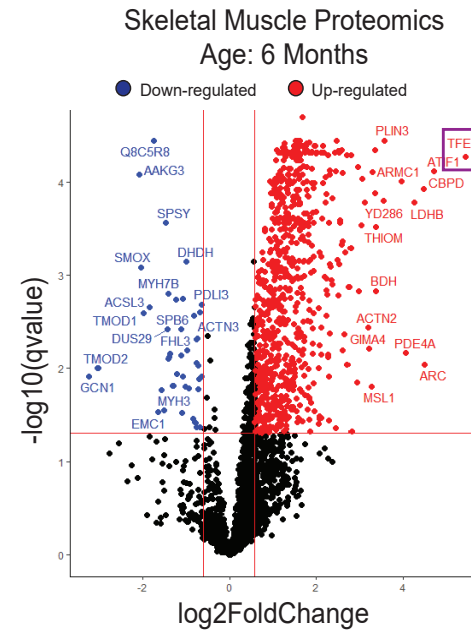

d.

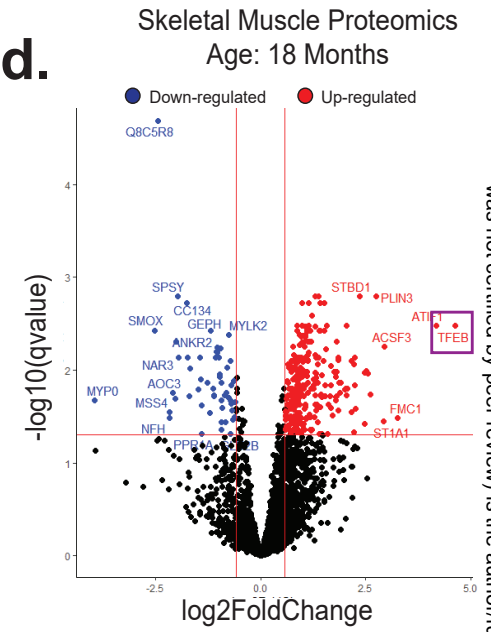

f.

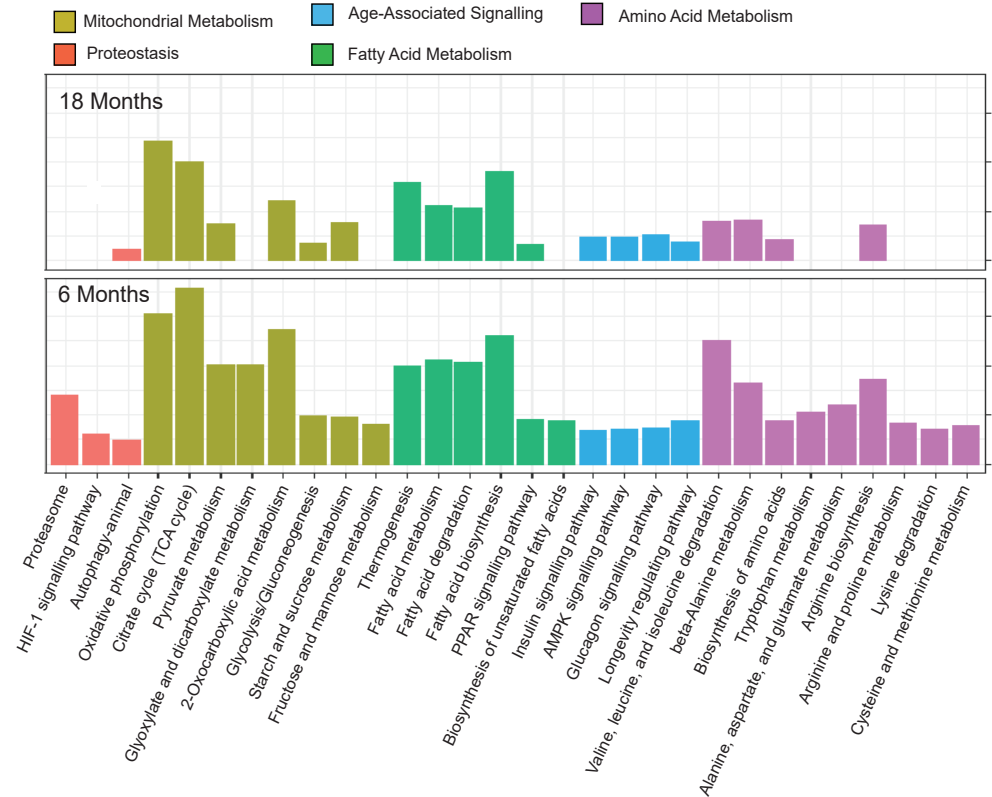

**Figure 1: Enhanced Proteostasis Preserves Mitochondrial Function and Amino Acid Metabolism in Aging Skeletal Muscle.** (a) Schematic depicting 3x-FLAG-human TFEB transgene. Cassettes are arranged from 5' (left) to 3' (right), with the  $\beta$ -actin promoter with CMV enhancer on the far 5' end, and a 3x-FLAG-eGFP STOP cassette flanked by loxP sites just 5' from the 3x-FLAG-human TFEB transgene. (b) Immunoblot of skeletal muscle lysates shows 3x-FLAG-TFEB expression (arrow) only in cTFEB;HSACre samples. Asterisk shows non-specific band demonstrating similar protein loading across samples (n=4 females/genotype, age: 6 months). (c-d) Proteomics analysis shows volcano plots of differentially expressed proteins in young (6 months) and aged (18 months) cTFEB;HSACre relative to control skeletal muscle (n=4 males/genotype/age). Each dot is a differentially expressed protein. Red dots are overrepresented proteins with TFEB-overexpression, and blue dots are proteins underrepresented with TFEB overexpression ( $p < 0.05$ ). Proteins that were not differentially expressed are shown in black (e) STRING analysis of overexpressed proteins in young TFEB-expressing skeletal muscle showing lysosomal network (in blue) and metabolic/aging network (in green). TFEB central node is shown in purple (f) KEGG enrichment analysis of differentially expressed proteins show significant enrichment for pathways known to modulate the biology of aging in cTFEB;HSACre transgenic mice. Enrichment of these pathways is mostly preserved in aged skeletal muscle.

Figure 2

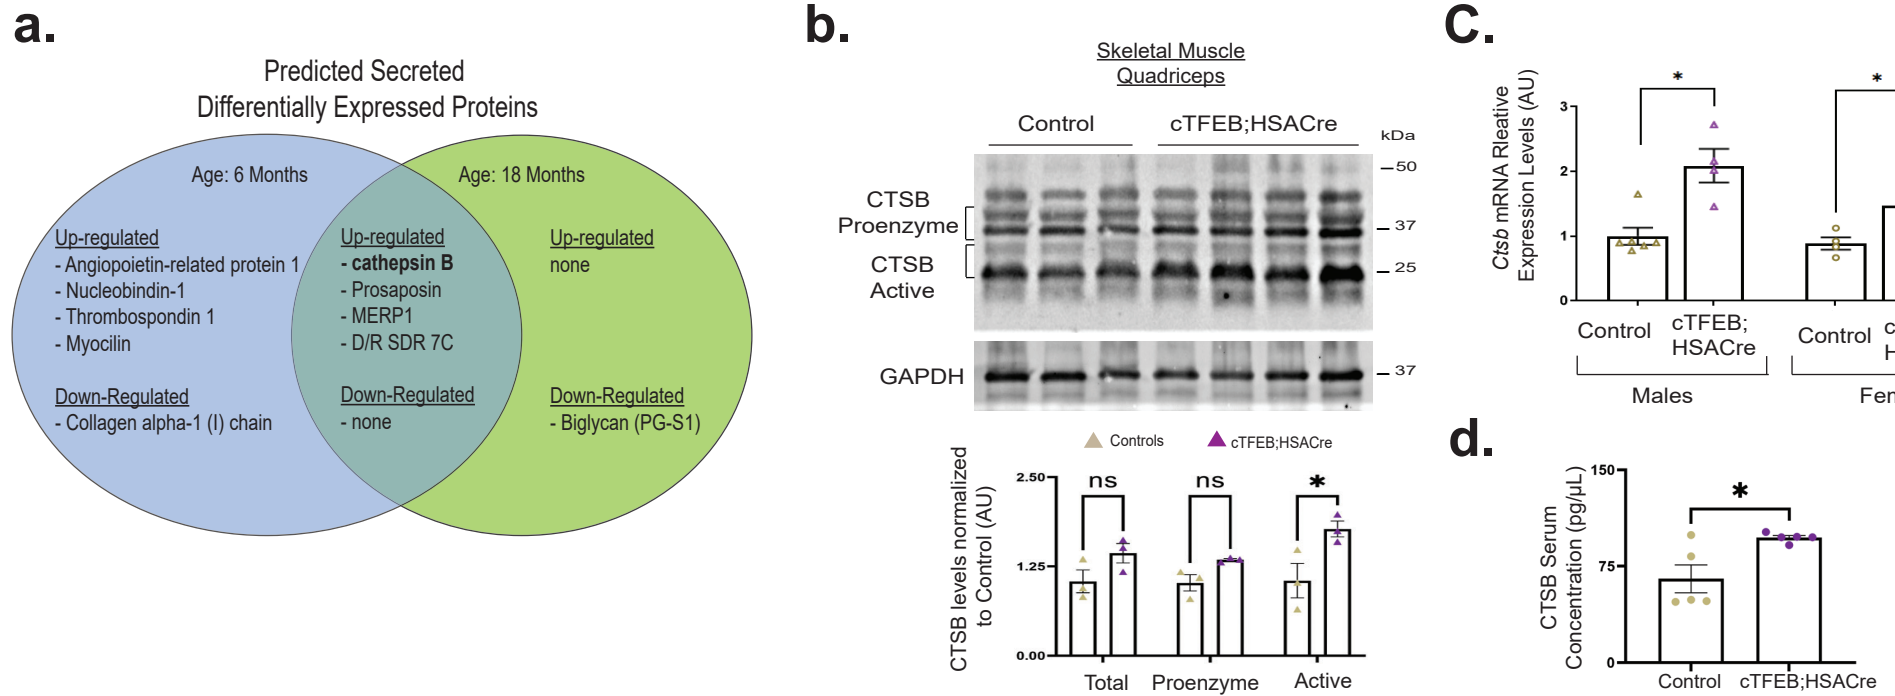

**Figure 2: Increased Expression and Secretion of Cathepsin B from Skeletal Muscle with Enhanced Proteostasis.** (a) VerSeDa-predicted secreted proteins identified as differentially expressed by proteomics studies in young (blue) and aged (green) cTFEB;HSACre mice. (b) Immunoblot analysis of cathepsin B protein. Note that the smaller, mature fragment of Cathepsin B is the secreted form (relative expression of total CTSB: controls:  $1.04 \pm 0.15$  and cTFEB;HSACre:  $1.43 \pm 0.13$ , relative expression of pro-enzyme CTSB: controls  $1.02 \pm 0.11$  and cTFEB;HSACre:  $1.34 \pm 0.02$ , relative expression of mature CTSB: controls  $1.05 \pm 0.24$  and cTFEB;HSACre:  $1.77 \pm 0.11$ , n=3-4 males/genotype, age; 6 months). (c) Increased expression of *Ctsb* in TFEB expressing skeletal muscle (relative expression of controls:  $1 \pm 0.20$  and cTFEB;HSACre:  $4.91 \pm 1.01$ ), n=3-6 sex/genotype, age: 6 months). Elevated levels of cathepsin B in serum from cTFEB;HSACre mice (controls:  $65.26 \pm 10.87$  pg/ $\mu$ l and cTFEB;HSACre:  $97.26 \pm 1.64$  pg/ $\mu$ l) n=5-6 females/genotype, age; 6 months). Data are represented as mean $\pm$  SEM \* p<0.05, \*\* p<0.01, T-test.

# Figure 3

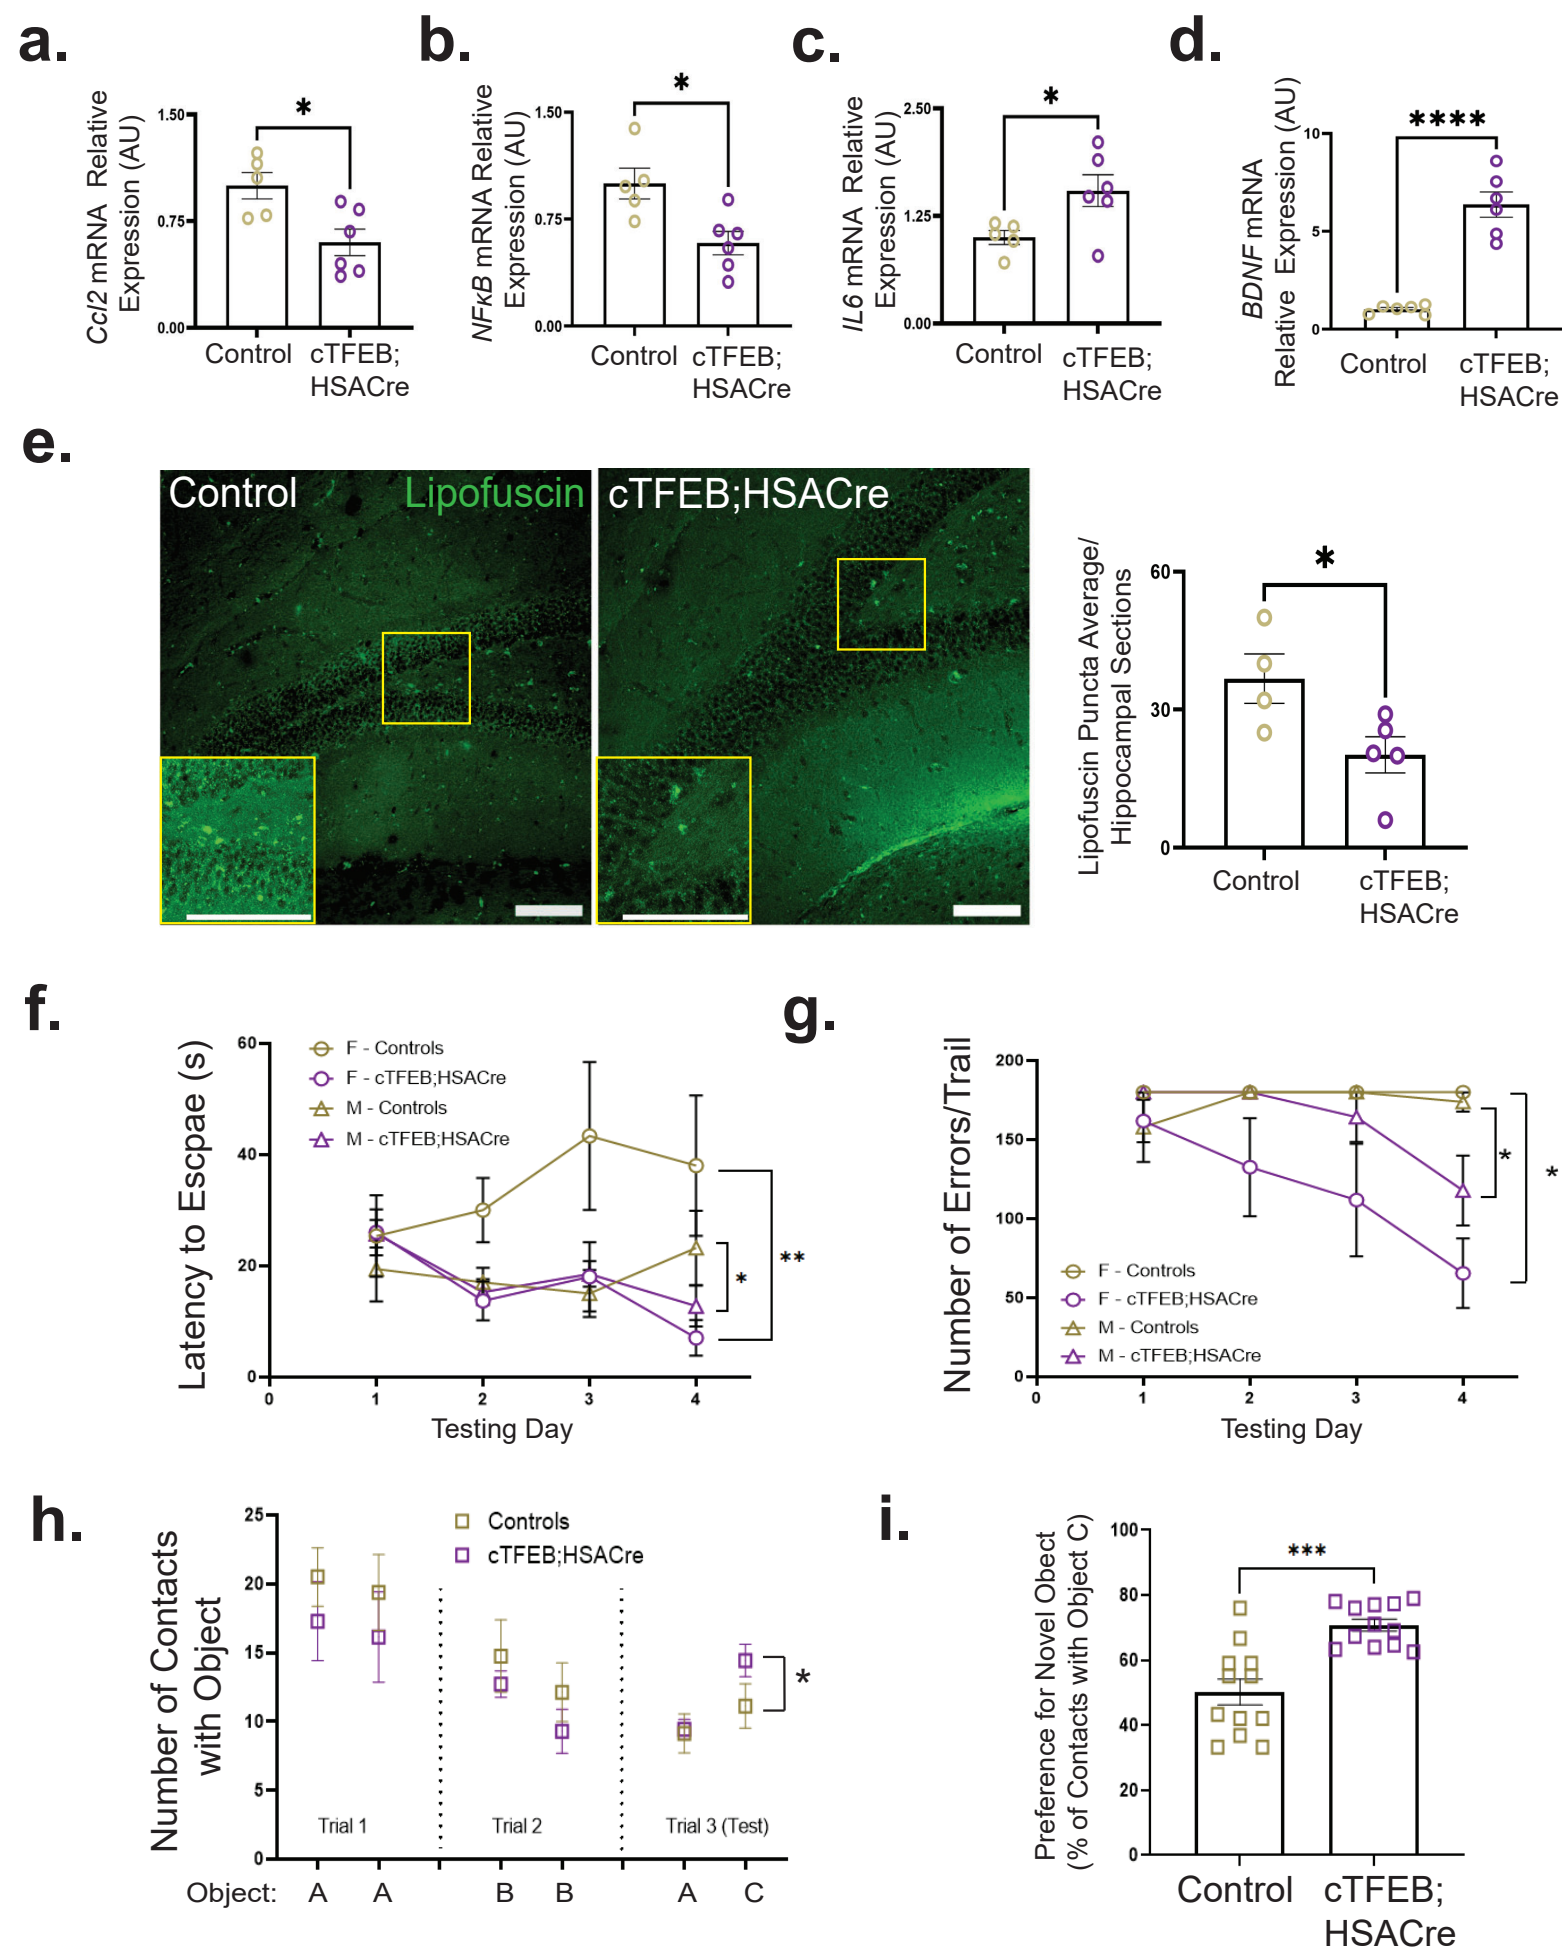

**Figure 3: Skeletal Muscle Expression of TFEB decreases Neuroinflammation, Lipofuscin Accumulation, and Improves Cognitive Performance in Aged Mice.** qRT-PCR of hippocampal lysates show decreased expression of *Ccl2* (relative expression of controls:  $1 \pm 0.11$  and cTFEB;HSACre  $0.60 \pm 0.09$ ) **(a)** and *NfκB* (relative expression of controls:  $1 \pm 0.11$  and cTFEB;HSACre  $0.58 \pm 0.082$ ) **(b)**, and increased expression of *Il6* (relative expression of controls:  $1 \pm 0.08$  and cTFEB;HSACre  $1.54 \pm 0.18$ ) **(c)** was detected in cTFEB;HSACre mice (n=6 females/genotype, age: 18 months) **(d)** Increased relative expression of BDNF in hippocampal lysates of cTFEB;HSACre mice relative to age-matched control littermates (controls:  $1.02 \pm 0.09$  vs. cTFEB;HSACre  $6.36 \pm 1.59$ , n=6 females/genotype, age: 18 months) **(e)** Decreased accumulation of auto-fluorescent punctae (lipofuscin) in the dentate gyrus of the hippocampus of cTFEB;HSACre mice (average number of lipofuscin deposits/section/individual of controls:  $36.75 \pm 5.37$  and of cTFEB;HSACre:  $20.2 \pm 3.92$ , n=4-5 females/genotype, age: 18 months). Each data point represents the average counts of 2-5 intact hippocampal sections/individual. Scale bars = 100 μm. Data are represented as mean± SEM \* p<0.05, \*\* p<0.01, \*\*\* p<0.001 T-test. **(f-i)** Neurocognitive battery of 18 month old cTFEB;HSACre and control animals. cTFEB;HSACre mice escaped the Barnes maze more quickly (at day 4, control males  $23.2 \pm 6.67$  vs cTFEB;HSACre males  $12.8 \pm 2.85$  seconds to escape, control females  $34.7 \pm 7.2$  vs cTFEB;HSACre females  $6.6 \pm 1.78$  seconds to escape) **(f)** and made significantly less errors (at day 4, control males  $173.9 \pm 6.13$  vs cTFEB;HSACre males  $117.0 \pm 22.14$  errors, control females  $180 \pm 1.2$  vs cTFEB;HSACre females  $65.45 \pm 22.02$  errors) **(g)** than their littermate controls (2-way ANOVA, Alpha =0.05 (F (1, 28) = 7.553, P=0.0104), post-hoc T-test. Additionally, cTFEB;HSACre mice made significantly more contacts **(i)** (controls:  $11.13 \pm 1.6$  vs. cTFEB;HSACre:  $14.43 \pm 1.18$  contacts with novel object) and displayed a higher preference with **(i)** (controls:  $50.19 \pm 13.72$  vs. cTFEB;HSACre:  $70.78 \pm 1.85\%$  preference for novel object) the novel object than their age-matched control littermates (2-way ANOVA, Alpha =0.05 (F (11, 33) = 2.534, P=0.0192), post-hoc Kruskal-wallis-test. Data are represented as mean ± SEM \* p<0.05, \*\* p<0.01.

# Figure 4

**a.**

Age : 6 months

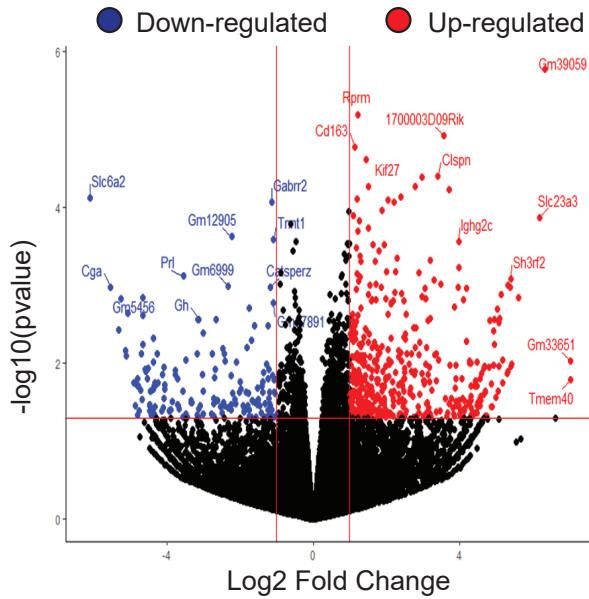

**b.**

Age : 24 months

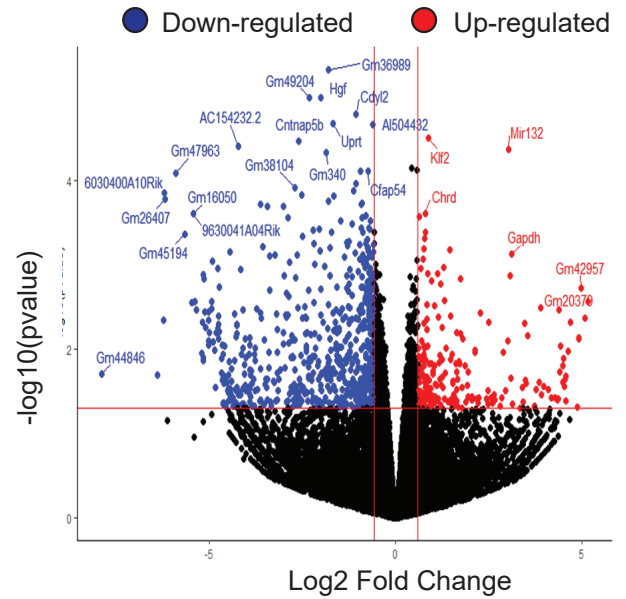

**c.**

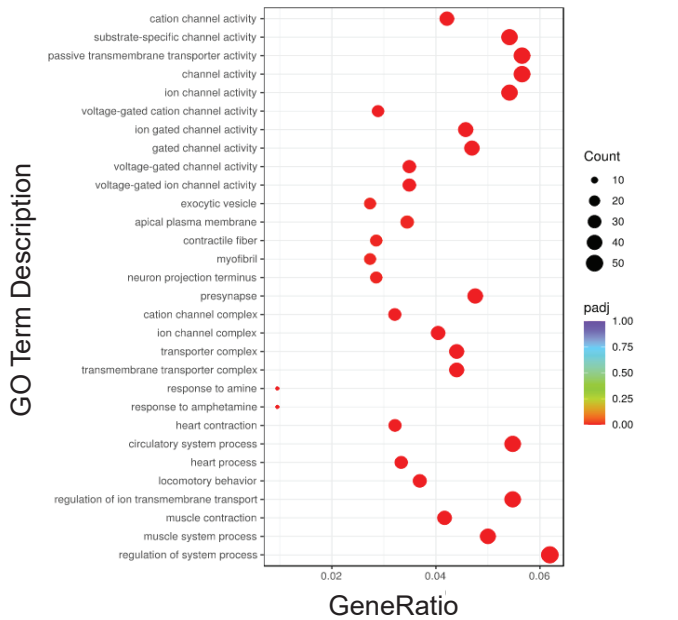

**d.**

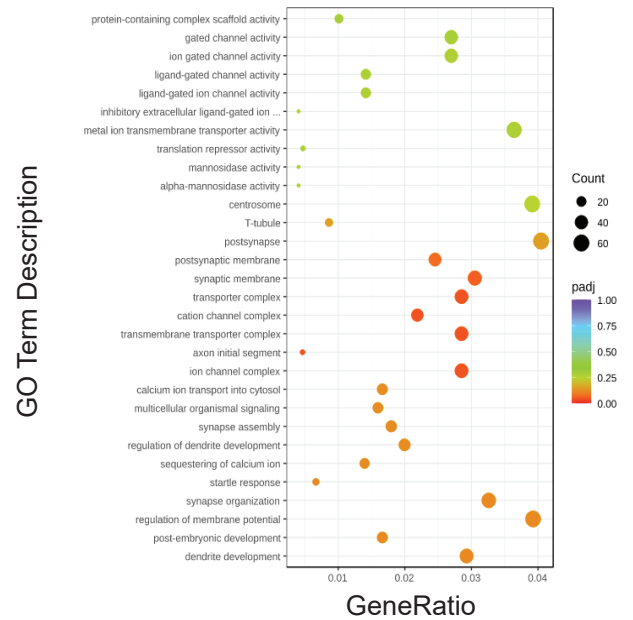

**e.**

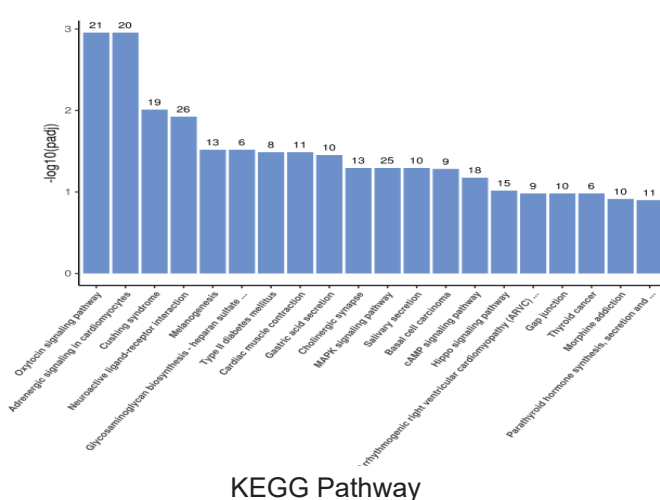

**f.**

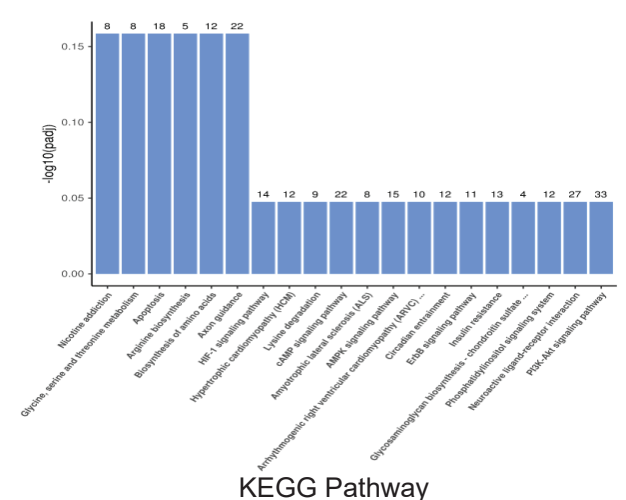

**Figure 4: Hippocampal Transcriptomic Remodeling Associated with Synaptic Function and Cognitive Performance in Female cTFEB;HSACre Transgenic Mice.** RNA-Seq of total hippocampal lysates showing differentially expressed transcripts in the hippocampi of young **(a)** and aged ( $p < 0.05$ ) **(b)** female cTFEB;HSACre mice (n=4 females/age/genotype, age: 6 months (young) and 24 months (aged)). **(c-d)** GO term analysis of differentially expressed genes in the hippocampi of young female cTFEB;HSACre mice. **(e-f)** KEGG pathway enrichment of differentially expressed transcripts in the CNS of young and aged cTFEB;HSACre transgenic mice.



# Figure 5

**a.**

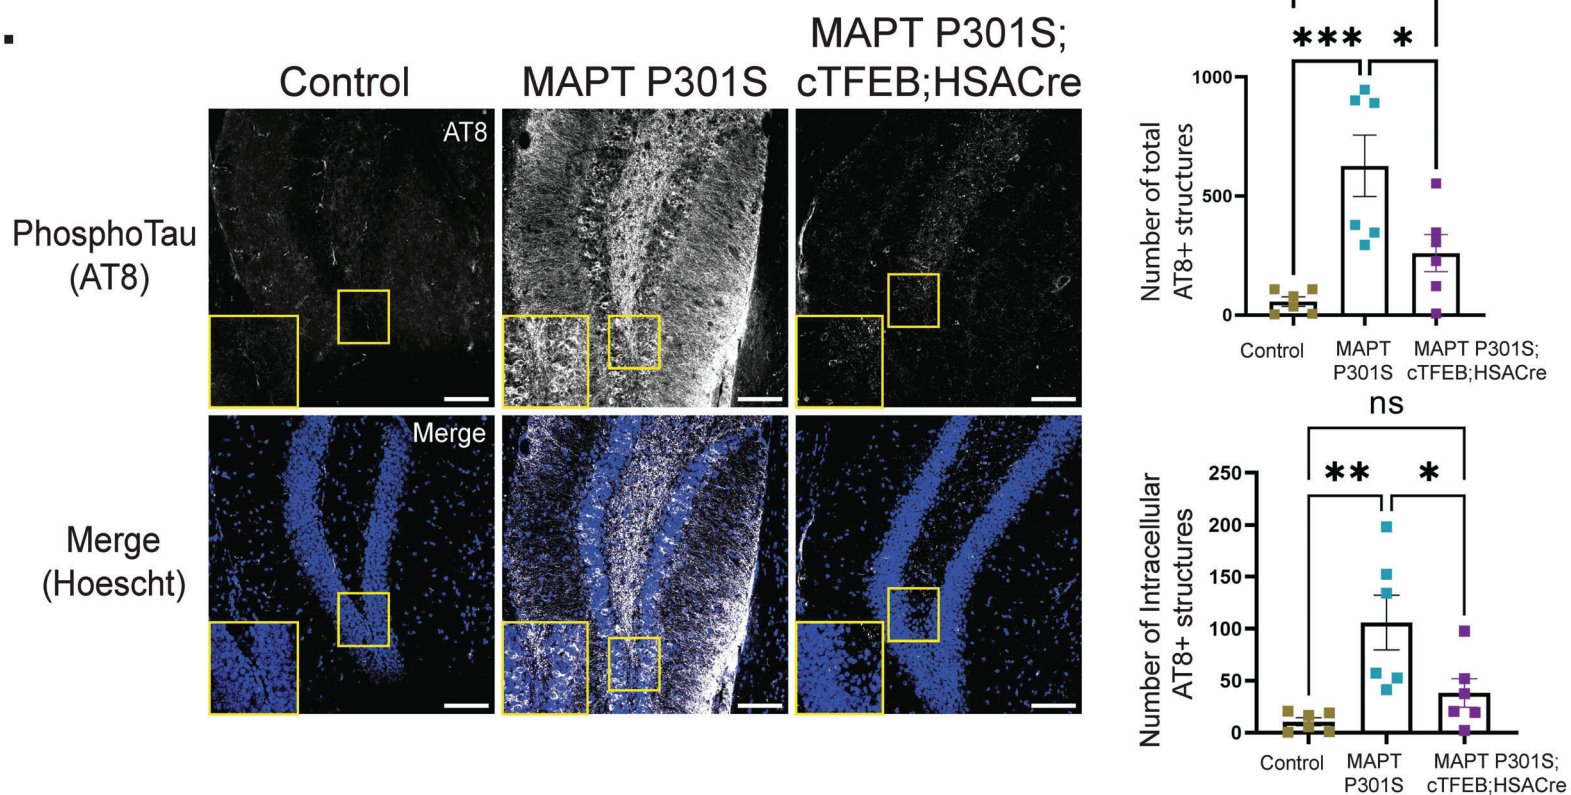

**b.**

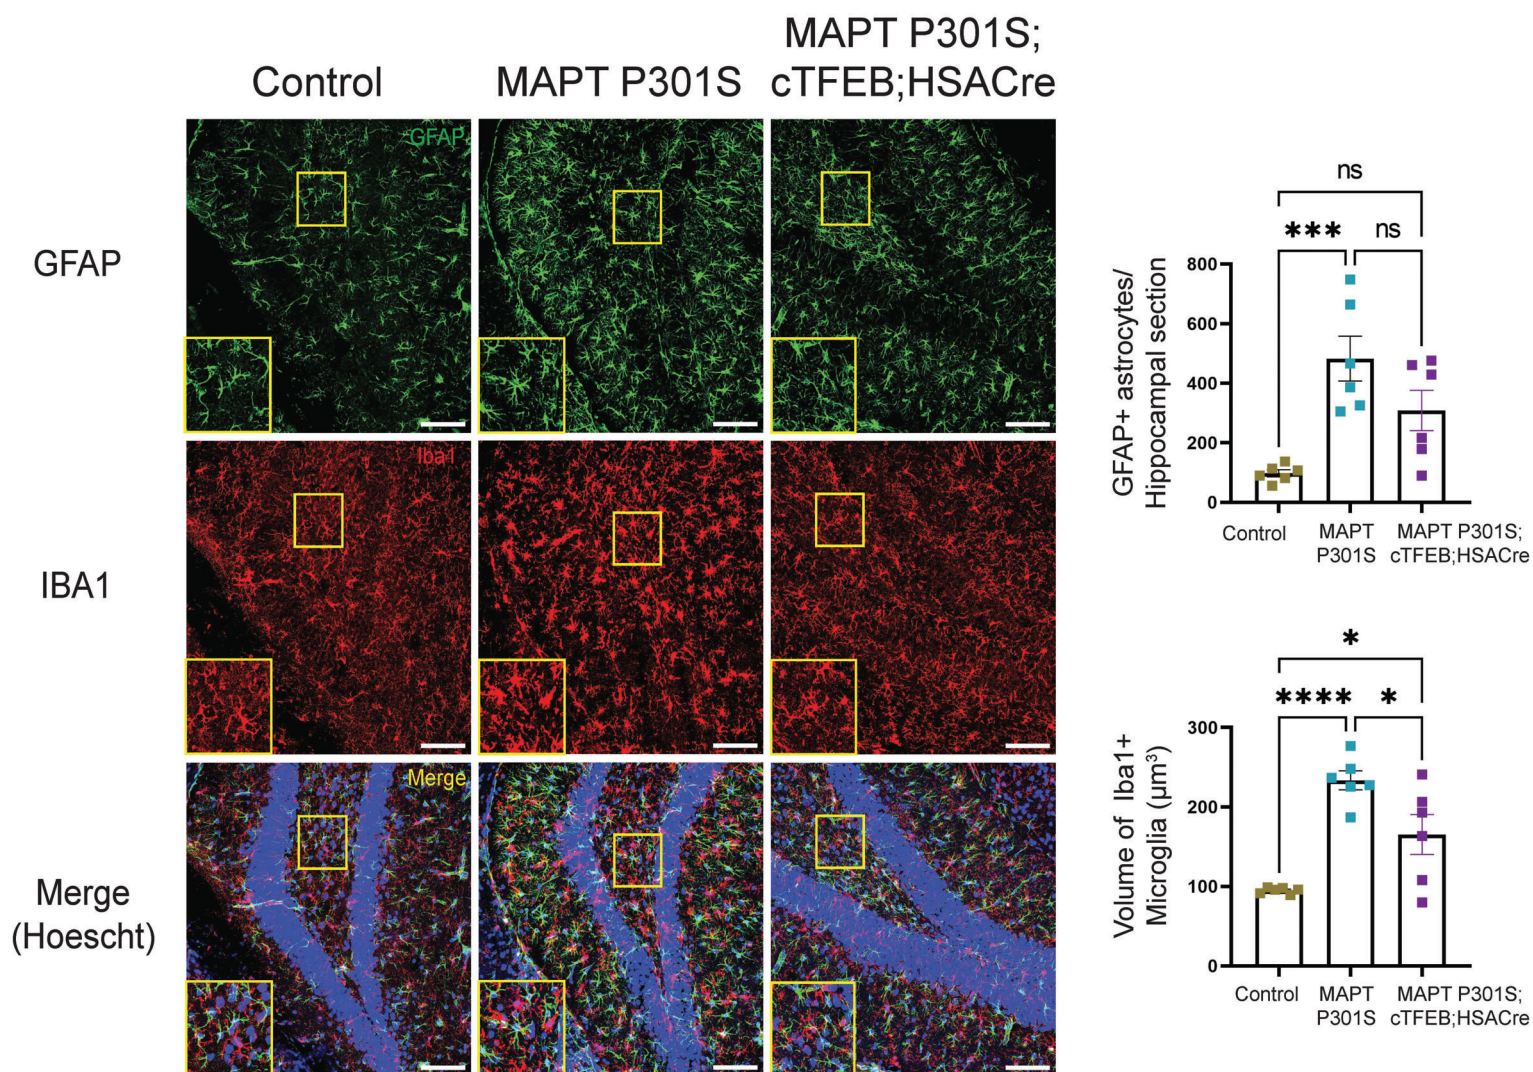

**Figure 5: Enhanced skeletal muscle proteostasis rescues Pathogenic Tau Accumulation and Reduces Neuroinflammation in a Mouse Model of Tau pathology. (a)**

Immunohistochemistry depicting PhosphoTau staining (white) and Hoescht staining (blue) in the hippocampal dentate gyrus of Control (top) MAPT P301S (middle), and triple transgenic MAPT P301S;cTFEB;HSACre mice (bottom). Insets depicting intracellular PTau are 5X zooms of areas demarcated by yellow squares. Scale bars = 100  $\mu$ m. Quantification of total Phosphotau tangles/section for both sexes of the three genotypes (mean of AT8+ structures in controls:  $57 \pm 19.87$ , MAPT P301S:  $626.4 \pm 129$ , MAPT P301S;cTFEB;HSACre:  $257.2 \pm 77.42$ ) (right) and for intracellular Phosphotau tangles (Phosphotau staining overlapping with at least one pixel of Hoescht, mean of controls:  $10.56 \pm 3.79$ , MAPT P301S  $105.0 \pm 26.32$ , MAPT P301S;cTFEB;HSACre:  $38.17 \pm 13.80$ ). Each data point represents the average counts of 2-5 intact hippocampal sections/individual (n=6, 3 males and 3 females/genotype, age: 9 months).

**(b)** Immunohistochemistry of GFAP (green), IBA1 (red), and Hoescht (blue) staining in the dentate gyrus of Control (top) MAPT P301S (middle), and triple transgenic MAPT P301S;cTFEB;HSACre mice (bottom). Insets depicting glia morphology are 5X zooms of areas demarcated by yellow squares. Scale bars = 100  $\mu$ m. Quantification for GFAP object number per section and process complexity (top right. Controls: mean number of astrocytes  $97.56 \pm 11.54$ , MAPT P301S mean number of astrocytes  $482.7 \pm 75.09$  and MAPT P301S;cTFEB;HSACre mean number of astrocytes  $308.5 \pm 68$ ) and IBA1+ microglia volume and process complexity (bottom right. Controls: mean volume of microglia  $94.76 \pm 1.61$ , MAPT P301S mean volume of microglia  $233.6 \pm 12.06$  and MAPT P301S;cTFEB;HSACre mean volume of microglia  $165.2 \pm 25.06$ ) for male and female mice of the three genotypes (n=6, 3 males and 3 females/genotype, age: 9 months). Each data point represents the average counts of 2-5 intact hippocampal sections/individual. Data are represented as mean  $\pm$  SEM \* p<0.05, \*\* p<0.01, \*\*\* p<0.001, One-way ANOVA, post-hoc T-test.

# Figure 6

a.

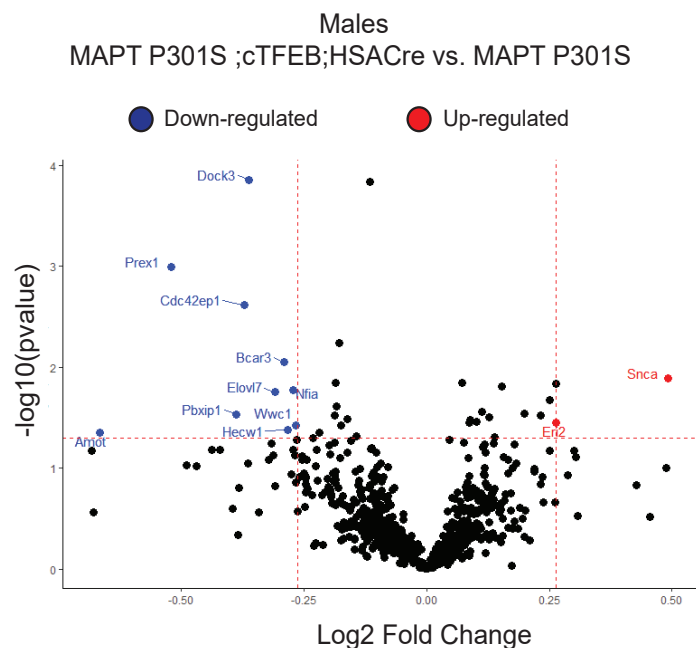

b.

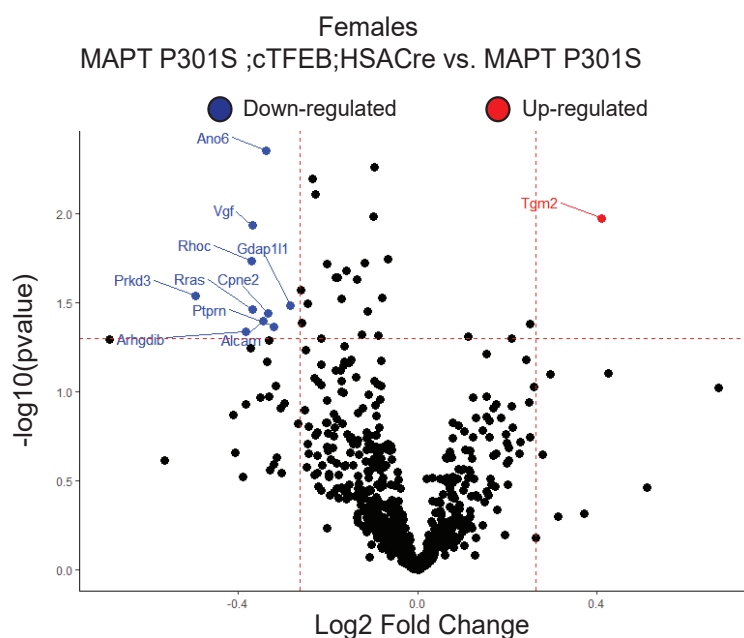

c.

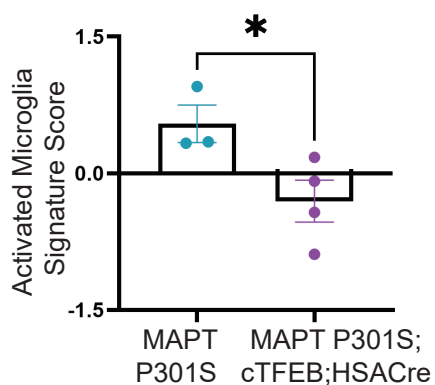

d.

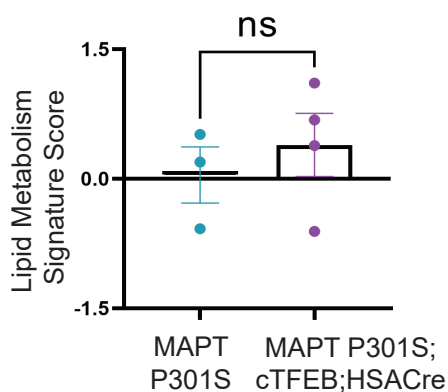

e.

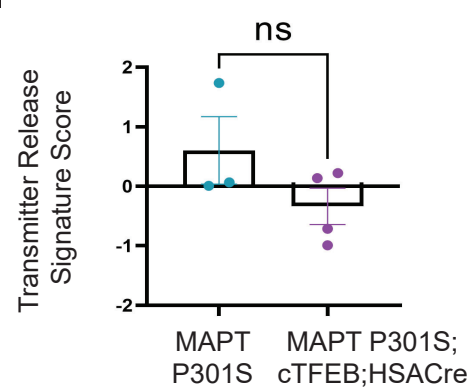

f.

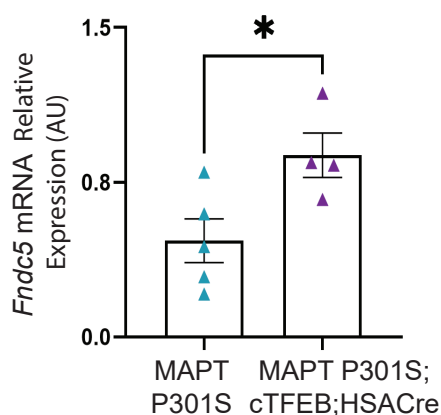

g.

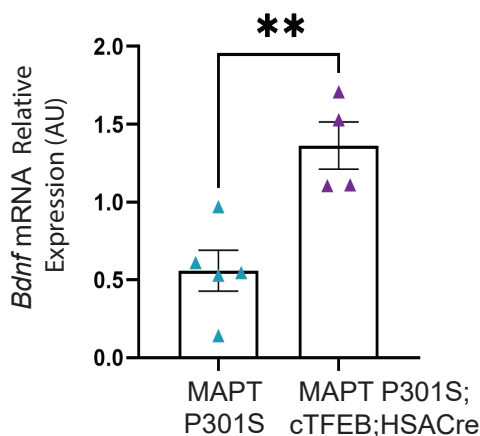

**Figure 6: Increased Neurotrophic signaling and Modulation of AD-associated gene expression in MAPT P301S Transgenic Mice with Enhanced Skeletal Muscle Proteostasis**

**(a-b)** Transcriptional expression of differentially regulated genes in the hippocampi of MAPT P301S;cTFEB;HSACre animals relative to age-matched MAPT P301S littermates ( $p < 0.05$ ). **(c)** Genes associated with microglial activation in the nCounter AD panel are downregulated in MAPT P301S;cTFEB;HSACre (score:  $-0.31 \pm 0.23$ ) compared to MAPT P301S age-matched littermates (score:  $0.54 \pm 0.21$ ). **(d-e)** Differential up-regulation of lipid metabolism (MAPT P301S score:  $0.04 \pm 0.3$  vs. MAPT P301S;cTFEB;HSACre score  $0.39 \pm 0.36$ ) and down-regulation of transmitter release (MAPT P301S score:  $0.60 \pm 0.56$  vs. MAPT P301S;cTFEB;HSACre score  $-0.34 \pm 0.30$ ) in MAPT P301S transgenic mice with enhanced skeletal muscle proteostasis. Analysis done via nSolver (Nanostring) differential gene expression analysis software. qRT-PCR of 9 month old female hippocampal lysates from the three aforementioned genotypes shows increased relative expression of BDNF (MAPT P301S:  $0.56 \pm 0.13$  vs. MAPT P301S;cTFEB;HSACre  $1.34 \pm 0.15$ , normalized to wild-type controls =1) **(f)** and FNDC5 (MAPT P301S:  $0.46 \pm 0.11$  vs. MAPT P301S;cTFEB;HSACre  $0.88 \pm 0.11$ , normalized to wild-type controls =1) **(g)** in MAPT P301S;cTFEB;HSACre mice relative to age-matched MAPT P301S littermates. Data are represented as mean  $\pm$  SEM \*  $p < 0.05$ , \*\*  $p < 0.01$ , T-test.
